# Supplementary material for: The Combination of Bioinformatics Analysis and Untargeted Metabolomics Reveals Potential Biomarkers and Key Metabolic Pathways in Asthma
Source: MDPI journal article supplement (doi:10.3390/metabo13010025), 2022-12-23
Supplement: s1 [file s1]

| <b>Sample</b> | <b>Disease</b> |
|---------------|----------------|
| GSM98206      | healthy        |
| GSM98207      | healthy        |
| GSM98209      | healthy        |
| GSM98211      | healthy        |
| GSM98212      | healthy        |
| GSM98213      | healthy        |
| GSM98217      | healthy        |
| GSM98218      | healthy        |
| GSM98219      | healthy        |
| GSM98221      | healthy        |
| GSM98222      | healthy        |
| GSM98223      | healthy        |
| GSM98225      | healthy        |
| GSM98229      | healthy        |
| GSM98230      | healthy        |
| GSM98234      | healthy        |
| GSM98235      | healthy        |
| GSM98236      | healthy        |
| GSM98239      | healthy        |
| GSM98240      | healthy        |
| GSM98241      | healthy        |
| GSM98242      | healthy        |
| GSM98243      | healthy        |
| GSM98244      | healthy        |
| GSM98245      | healthy        |
| GSM98251      | healthy        |
| GSM98254      | healthy        |
| GSM98258      | healthy        |
| GSM98141      | Asthma         |
| GSM98142      | Asthma         |
| GSM98143      | Asthma         |
| GSM98144      | Asthma         |
| GSM98145      | Asthma         |
| GSM98146      | Asthma         |
| GSM98147      | Asthma         |
| GSM98148      | Asthma         |
| GSM98149      | Asthma         |
| GSM98150      | Asthma         |
| GSM98151      | Asthma         |
| GSM98152      | Asthma         |
| GSM98153      | Asthma         |
| GSM98154      | Asthma         |
| GSM98155      | Asthma         |

---

|          |        |
|----------|--------|
| GSM98156 | Asthma |
| GSM98157 | Asthma |
| GSM98158 | Asthma |
| GSM98159 | Asthma |
| GSM98160 | Asthma |
| GSM98161 | Asthma |
| GSM98162 | Asthma |
| GSM98163 | Asthma |
| GSM98164 | Asthma |
| GSM98165 | Asthma |
| GSM98166 | Asthma |
| GSM98167 | Asthma |
| GSM98168 | Asthma |
| GSM98169 | Asthma |
| GSM98170 | Asthma |
| GSM98171 | Asthma |
| GSM98172 | Asthma |
| GSM98173 | Asthma |
| GSM98174 | Asthma |
| GSM98175 | Asthma |
| GSM98176 | Asthma |
| GSM98177 | Asthma |
| GSM98178 | Asthma |
| GSM98179 | Asthma |
| GSM98180 | Asthma |
| GSM98181 | Asthma |
| GSM98182 | Asthma |
| GSM98183 | Asthma |
| GSM98184 | Asthma |
| GSM98185 | Asthma |
| GSM98186 | Asthma |
| GSM98187 | Asthma |
| GSM98188 | Asthma |
| GSM98189 | Asthma |
| GSM98190 | Asthma |
| GSM98191 | Asthma |
| GSM98192 | Asthma |
| GSM98193 | Asthma |
| GSM98194 | Asthma |
| GSM98195 | Asthma |
| GSM98196 | Asthma |
| GSM98197 | Asthma |
| GSM98198 | Asthma |
| GSM98199 | Asthma |

---

---

|          |        |
|----------|--------|
| GSM98200 | Asthma |
| GSM98201 | Asthma |
| GSM98202 | Asthma |
| GSM98203 | Asthma |
| GSM98204 | Asthma |
| GSM98208 | Asthma |
| GSM98210 | Asthma |
| GSM98214 | Asthma |
| GSM98215 | Asthma |
| GSM98216 | Asthma |
| GSM98220 | Asthma |
| GSM98224 | Asthma |
| GSM98226 | Asthma |
| GSM98227 | Asthma |
| GSM98228 | Asthma |

---
