# Supplementary material for: The Combination of Bioinformatics Analysis and Untargeted Metabolomics Reveals Potential Biomarkers and Key Metabolic Pathways in Asthma
Source: MDPI journal article supplement (doi:10.3390/metabo13010025), 2022-12-23
Supplement: s1 [file s1]

| <b>Sample</b> | <b>NMF cluster</b> | <b>Disease</b> |
|---------------|--------------------|----------------|
| GSM1978047    | cluster 1          | asthma         |
| GSM1978057    | cluster 1          | asthma         |
| GSM1978098    | cluster 1          | asthma         |
| GSM1978143    | cluster 1          | asthma         |
| GSM1978147    | cluster 1          | asthma         |
| GSM1978152    | cluster 1          | asthma         |
| GSM1978164    | cluster 1          | health         |
| GSM1978036    | cluster2           | asthma         |
| GSM1978037    | cluster2           | asthma         |
| GSM1978038    | cluster2           | asthma         |
| GSM1978043    | cluster2           | asthma         |
| GSM1978045    | cluster2           | asthma         |
| GSM1978048    | cluster2           | asthma         |
| GSM1978050    | cluster2           | asthma         |
| GSM1978051    | cluster2           | asthma         |
| GSM1978053    | cluster2           | asthma         |
| GSM1978054    | cluster2           | asthma         |
| GSM1978055    | cluster2           | asthma         |
| GSM1978056    | cluster2           | asthma         |
| GSM1978062    | cluster2           | asthma         |
| GSM1978064    | cluster2           | asthma         |
| GSM1978072    | cluster2           | asthma         |
| GSM1978077    | cluster2           | asthma         |
| GSM1978085    | cluster2           | asthma         |
| GSM1978091    | cluster2           | asthma         |
| GSM1978093    | cluster2           | asthma         |
| GSM1978094    | cluster2           | asthma         |
| GSM1978095    | cluster2           | asthma         |
| GSM1978099    | cluster2           | asthma         |
| GSM1978101    | cluster2           | asthma         |
| GSM1978102    | cluster2           | asthma         |
| GSM1978103    | cluster2           | asthma         |
| GSM1978104    | cluster2           | asthma         |
| GSM1978105    | cluster2           | asthma         |
| GSM1978106    | cluster2           | asthma         |
| GSM1978107    | cluster2           | asthma         |
| GSM1978108    | cluster2           | asthma         |
| GSM1978109    | cluster2           | asthma         |
| GSM1978110    | cluster2           | asthma         |
| GSM1978111    | cluster2           | asthma         |
| GSM1978115    | cluster2           | asthma         |
| GSM1978119    | cluster2           | asthma         |
| GSM1978120    | cluster2           | asthma         |

---

|            |          |        |
|------------|----------|--------|
| GSM1978121 | cluster2 | asthma |
| GSM1978123 | cluster2 | asthma |
| GSM1978126 | cluster2 | asthma |
| GSM1978128 | cluster2 | asthma |
| GSM1978129 | cluster2 | asthma |
| GSM1978130 | cluster2 | asthma |
| GSM1978131 | cluster2 | asthma |
| GSM1978133 | cluster2 | asthma |
| GSM1978134 | cluster2 | asthma |
| GSM1978135 | cluster2 | asthma |
| GSM1978136 | cluster2 | asthma |
| GSM1978140 | cluster2 | asthma |
| GSM1978141 | cluster2 | asthma |
| GSM1978142 | cluster2 | asthma |
| GSM1978144 | cluster2 | asthma |
| GSM1978145 | cluster2 | asthma |
| GSM1978146 | cluster2 | asthma |
| GSM1978150 | cluster2 | asthma |
| GSM1978151 | cluster2 | asthma |
| GSM1978153 | cluster2 | health |
| GSM1978154 | cluster2 | health |
| GSM1978155 | cluster2 | health |
| GSM1978156 | cluster2 | health |
| GSM1978157 | cluster2 | health |
| GSM1978158 | cluster2 | health |
| GSM1978159 | cluster2 | health |
| GSM1978160 | cluster2 | health |
| GSM1978161 | cluster2 | health |
| GSM1978162 | cluster2 | health |
| GSM1978165 | cluster2 | health |
| GSM1978166 | cluster2 | health |
| GSM1978168 | cluster2 | health |
| GSM1978169 | cluster2 | health |
| GSM1978170 | cluster2 | health |
| GSM1978171 | cluster2 | health |
| GSM1978172 | cluster2 | health |
| GSM1978173 | cluster2 | health |
| GSM1978035 | cluster3 | asthma |
| GSM1978039 | cluster3 | asthma |
| GSM1978040 | cluster3 | asthma |
| GSM1978041 | cluster3 | asthma |
| GSM1978042 | cluster3 | asthma |
| GSM1978044 | cluster3 | asthma |
| GSM1978046 | cluster3 | asthma |

---

---

|            |          |        |
|------------|----------|--------|
| GSM1978049 | cluster3 | asthma |
| GSM1978052 | cluster3 | asthma |
| GSM1978058 | cluster3 | asthma |
| GSM1978059 | cluster3 | asthma |
| GSM1978060 | cluster3 | asthma |
| GSM1978061 | cluster3 | asthma |
| GSM1978063 | cluster3 | asthma |
| GSM1978065 | cluster3 | asthma |
| GSM1978066 | cluster3 | asthma |
| GSM1978067 | cluster3 | asthma |
| GSM1978068 | cluster3 | asthma |
| GSM1978069 | cluster3 | asthma |
| GSM1978070 | cluster3 | asthma |
| GSM1978071 | cluster3 | asthma |
| GSM1978073 | cluster3 | asthma |
| GSM1978074 | cluster3 | asthma |
| GSM1978075 | cluster3 | asthma |
| GSM1978076 | cluster3 | asthma |
| GSM1978078 | cluster3 | asthma |
| GSM1978079 | cluster3 | asthma |
| GSM1978080 | cluster3 | asthma |
| GSM1978081 | cluster3 | asthma |
| GSM1978082 | cluster3 | asthma |
| GSM1978083 | cluster3 | asthma |
| GSM1978084 | cluster3 | asthma |
| GSM1978086 | cluster3 | asthma |
| GSM1978087 | cluster3 | asthma |
| GSM1978088 | cluster3 | asthma |
| GSM1978089 | cluster3 | asthma |
| GSM1978090 | cluster3 | asthma |
| GSM1978092 | cluster3 | asthma |
| GSM1978096 | cluster3 | asthma |
| GSM1978097 | cluster3 | asthma |
| GSM1978100 | cluster3 | asthma |
| GSM1978112 | cluster3 | asthma |
| GSM1978113 | cluster3 | asthma |
| GSM1978114 | cluster3 | asthma |
| GSM1978116 | cluster3 | asthma |
| GSM1978117 | cluster3 | asthma |
| GSM1978118 | cluster3 | asthma |
| GSM1978122 | cluster3 | asthma |
| GSM1978124 | cluster3 | asthma |
| GSM1978125 | cluster3 | asthma |
| GSM1978127 | cluster3 | asthma |

---

---

|            |          |        |
|------------|----------|--------|
| GSM1978132 | cluster3 | asthma |
| GSM1978137 | cluster3 | asthma |
| GSM1978138 | cluster3 | asthma |
| GSM1978139 | cluster3 | asthma |
| GSM1978148 | cluster3 | asthma |
| GSM1978149 | cluster3 | asthma |
| GSM1978163 | cluster3 | health |
| GSM1978167 | cluster3 | health |

---
