# Supplementary material for: The Combination of Bioinformatics Analysis and Untargeted Metabolomics Reveals Potential Biomarkers and Key Metabolic Pathways in Asthma
Source: Metabolites. 2022 Dec 23;13(1):25. doi: 10.3390/metabo13010025 (PMC9860906; doi:10.3390/metabo13010025)
Supplement: Supplementary file 1 [file metabolites-13-00025-s001.zip]

Archive with 6 entries (6 files):
- Supplementary figure S1.tif
- Supplementary figure S2.tif
- Supplementary figure S3.tif
- Supplementary table S1--The samples of GSE76262 were  respectively clustered in the disease condition and NMF typing.pdf
- Supplementary table S2--Clustering of samples in healthy and diseased groups  in GSE4302.pdf
- Supplementary table S3--All DEGs of GSE76262 .xls
