# Supplementary material for: The Combination of Bioinformatics Analysis and Untargeted Metabolomics Reveals Potential Biomarkers and Key Metabolic Pathways in Asthma
Source: Metabolites. 2022 Dec 23;13(1):25. doi: 10.3390/metabo13010025 (PMC9860906; doi:10.3390/metabo13010025)
Supplement: Supplementary file 1 [file metabolites-13-00025-s001.zip › Supplementary table S3--All DEGs of GSE76262 .xls]

## Sheet: Sheet1
logFC	AveExpr	t	P.Value	adj.P.Val	B
TLR7	-0.848237	5.39608	-6.88098	1.77786e-10	3.10504e-06	13.2593
GPR85	-1.00214	2.9025	-5.87247	2.93254e-08	0.000170723	8.56702
NFIA	-0.707023	4.54605	-5.65023	8.51624e-08	0.00037184	7.58918
CSTA	-0.87951	10.4139	-5.24973	5.47013e-07	0.0010173	5.88632
WWP1	-0.890961	5.48259	-5.23322	5.8955e-07	0.0010173	5.81786
MBNL3	-0.706881	4.56638	-5.21333	6.45118e-07	0.0010173	5.73552
GSPT1	-0.597609	6.76924	-5.18469	7.34139e-07	0.0010173	5.61739
MYO6	-0.869663	6.93457	-5.13504	9.17581e-07	0.0010173	5.41362
MYL5	-0.540572	5.3326	-5.13157	9.31965e-07	0.0010173	5.39941
SPINT1	-0.878004	6.65979	-5.07285	1.21112e-06	0.00115457	5.16017
HN1	-0.605236	8.19052	-5.01307	1.57824e-06	0.0012529	4.91853
VPS36	-0.92013	6.09697	-4.98153	1.8134e-06	0.00126684	4.79183
RYR1	-0.831125	5.13383	-4.94663	2.11327e-06	0.00140423	4.65227
HADH	-0.744229	5.89674	-4.90206	2.56685e-06	0.00140423	4.47502
ITGAL	-0.871089	7.4958	-4.80279	3.94204e-06	0.00163923	4.08424
FTSJ2	-0.764927	6.11734	-4.67548	6.77688e-06	0.00232075	3.59135
ZNF436	-0.578591	4.40595	-4.64541	7.69148e-06	0.00248717	3.4763
GLTP	-0.558173	7.08597	-4.63607	7.99905e-06	0.00248717	3.44067
UNC5B	-0.703611	6.35041	-4.61884	8.59765e-06	0.0024898	3.37511
CD59	-0.525842	8.64639	-4.61223	8.83867e-06	0.0024898	3.35
OCRL	-0.702719	5.12887	-4.60271	9.19742e-06	0.00252786	3.31387
TMEM30A	-0.656899	7.74097	-4.601	9.26326e-06	0.00252786	3.30739
BLVRB	-0.632381	7.83584	-4.59058	9.67475e-06	0.0025647	3.26792
OXR1	-0.785754	5.77048	-4.57848	1.01746e-05	0.00265223	3.22219
MYO5A	-0.661755	4.65486	-4.56034	1.0971e-05	0.00273728	3.15378
RPTN	-0.823799	3.31966	-4.54116	1.18789e-05	0.00292205	3.08163
KCNAB1	-0.73288	5.52427	-4.50485	1.37991e-05	0.0031806	2.9457
TRPC6	-0.900486	4.63911	-4.50412	1.38406e-05	0.0031806	2.94298
STK39	-1.34225	5.61143	-4.49076	1.4622e-05	0.00331653	2.89318
SPIN1	-0.668636	6.84538	-4.47675	1.54871e-05	0.00338606	2.84106
SPA17	-0.67617	4.16243	-4.44997	1.72801e-05	0.00350926	2.74178
RNF146	-0.566801	6.88136	-4.44263	1.78049e-05	0.00357427	2.71467
ATP5G3	-0.638181	7.85193	-4.4314	1.8639e-05	0.00360291	2.67319
TSEN2	-1.0255	4.46557	-4.42964	1.87727e-05	0.00360291	2.66671
BACE1	-0.691952	6.41135	-4.41057	2.02854e-05	0.0036764	2.59652
KCTD12	-0.661693	9.04782	-4.41032	2.03063e-05	0.0036764	2.59559
CRLS1	-0.580964	6.1347	-4.40902	2.04131e-05	0.0036764	2.59084
LIMA1	-0.919489	5.94658	-4.40163	2.10344e-05	0.00374863	2.56369
FBXO30	-0.672131	4.60902	-4.39111	2.19493e-05	0.0037955	2.52513
B3GALNT1	-0.568989	4.16292	-4.37692	2.32444e-05	0.0039035	2.47324
CPVL	-0.872418	8.34599	-4.33556	2.74537e-05	0.00443685	2.32264
CAMP	-0.692166	7.00051	-4.33382	2.76455e-05	0.00443685	2.31634
CAND1	-0.572785	5.39608	-4.33342	2.76906e-05	0.00443685	2.31487
TASP1	-0.555576	3.58859	-4.3263	2.84922e-05	0.00448762	2.28906
PNPO	-0.524722	6.68854	-4.32291	2.88814e-05	0.00448762	2.27679
CCNYL1	-0.910042	6.06976	-4.32158	2.90353e-05	0.00448762	2.27198
SSR3	-0.612748	7.81552	-4.31585	2.97089e-05	0.00454375	2.25124
PIGP	-0.753906	6.10621	-4.29843	3.18487e-05	0.00467426	2.18836
ATP5J	-0.731564	9.31109	-4.28692	3.33428e-05	0.00478793	2.14692
NAA20	-0.799084	7.26535	-4.27877	3.44416e-05	0.00478793	2.11762
PTPLAD1	-0.799168	5.81276	-4.27436	3.50504e-05	0.00482012	2.10179
GNG12	-0.652997	6.0012	-4.26684	3.61118e-05	0.00492728	2.07483
FAM115A	-0.557115	5.67111	-4.26372	3.65613e-05	0.00494994	2.06365
CTNND1	-0.535782	6.48438	-4.25876	3.72874e-05	0.00497118	2.04589
PLBD1	-0.666633	8.95797	-4.2402	4.01292e-05	0.0051393	1.97955
SUCLG2	-1.04393	6.14009	-4.23963	4.02195e-05	0.0051393	1.97752
MAN2B2	-0.694679	8.14621	-4.23935	4.02641e-05	0.0051393	1.97652
TTC15	-0.712558	6.29565	-4.22684	4.23014e-05	0.00531507	1.93195
MANEA	-0.613742	4.51103	-4.22416	4.27497e-05	0.00532613	1.92243
MRPS10	-0.632838	6.59441	-4.22268	4.29994e-05	0.00532613	1.91717
ZYG11B	-0.730133	5.96282	-4.20649	4.58269e-05	0.00548197	1.85968
TCEA3	-1.01165	7.16885	-4.19674	4.76159e-05	0.00550002	1.82513
LOC158960	-0.705391	7.38522	-4.18734	4.94023e-05	0.00555351	1.79189
NHLRC3	-1.07641	6.12257	-4.18102	5.0639e-05	0.00559753	1.76959
WDR36	-0.558024	4.42089	-4.17521	5.18034e-05	0.00560284	1.74908
HSDL2	-0.628815	5.07114	-4.1724	5.23747e-05	0.00560284	1.73919
LTA4H	-0.789411	10.208	-4.16395	5.41313e-05	0.00560284	1.70943
PRKACB	-0.940195	6.80141	-4.16054	5.48574e-05	0.00560284	1.69742
SLC25A20	-0.645071	6.19168	-4.15663	5.56998e-05	0.00565579	1.68368
TIMP2	-0.535053	9.59403	-4.15369	5.63406e-05	0.00568779	1.67336
ECHDC1	-0.559469	8.32614	-4.14942	5.72844e-05	0.00574984	1.65838
DDX1	-0.661534	7.43673	-4.14621	5.80057e-05	0.00575947	1.6471
ZHX1	-0.634692	5.38016	-4.14565	5.8131e-05	0.00575947	1.64516
EIF3E	-0.569129	8.86146	-4.13876	5.97095e-05	0.00585858	1.62101
AGPS	-0.721711	6.62119	-4.13266	6.11403e-05	0.00593231	1.59966
MPEG1	-0.798542	8.24289	-4.12524	6.29267e-05	0.00597291	1.57371
RGNEF	-0.561537	4.78125	-4.10605	6.77758e-05	0.00620352	1.50682
KAL1	-1.0645	6.11446	-4.10593	6.78084e-05	0.00620352	1.50639
TULP4	-0.589836	5.84287	-4.10341	6.84719e-05	0.00620352	1.49762
ITGAE	-0.795829	8.19819	-4.09977	6.94396e-05	0.00620352	1.48498
HLA-DMB	-0.696595	9.44516	-4.09928	6.95725e-05	0.00620352	1.48325
PRSS21	-0.801184	6.57609	-4.08797	7.26723e-05	0.00629123	1.444
UEVLD	-0.550739	4.96909	-4.08416	7.37471e-05	0.00629123	1.43078
CS	-0.581243	8.33035	-4.08059	7.4765e-05	0.00630737	1.41843
LRRC8D	-0.545371	7.28258	-4.07663	7.59138e-05	0.00630737	1.4047
AIG1	-0.939034	6.2824	-4.0746	7.65078e-05	0.00630737	1.39769
TRHDE	-1.1457	5.02331	-4.07372	7.67672e-05	0.00630737	1.39464
COX5B	-0.507857	8.7411	-4.07354	7.6821e-05	0.00630737	1.39401
RCN2	-0.602812	5.03004	-4.07334	7.68809e-05	0.00630737	1.39331
DDHD1	-0.743258	6.46251	-4.07322	7.69147e-05	0.00630737	1.39291
CECR1	-0.667969	9.26312	-4.07048	7.77285e-05	0.00631422	1.38344
RBMS2	-0.550799	5.76196	-4.06867	7.82714e-05	0.00631422	1.37717
USP6NL	-0.751456	5.23838	-4.06703	7.87647e-05	0.00631422	1.37152
RHBDD1	-0.541373	5.46201	-4.06687	7.88147e-05	0.00631422	1.37095
TNFSF12	-0.721584	7.73129	-4.06447	7.95425e-05	0.00633275	1.36267
MRPS21	-0.759363	7.88663	-4.05907	8.12077e-05	0.00635062	1.34402
C5orf22	-0.57675	5.31168	-4.05715	8.1805e-05	0.00635062	1.33743
MFSD6	-0.833793	5.95502	-4.05712	8.18145e-05	0.00635062	1.33732
COX6C	-0.850503	9.24059	-4.05231	8.33362e-05	0.00641882	1.32074
MRPS33	-0.886431	6.16067	-4.0434	8.62252e-05	0.00649356	1.29008
PARN	-0.644468	5.67248	-4.03185	9.01144e-05	0.00666885	1.25039
C8B	-0.990674	6.67406	-4.02588	9.21879e-05	0.00673636	1.22993
C9orf5	-0.644292	5.98352	-4.02511	9.24604e-05	0.00673636	1.22727
MMD	-0.950668	7.43147	-4.02102	9.3911e-05	0.0067675	1.21327
CHD9	-0.557999	4.49674	-4.02097	9.39297e-05	0.0067675	1.2131
FGD5	-0.733278	7.18094	-4.02033	9.41599e-05	0.0067675	1.2109
PYCARD	-0.547537	8.77919	-4.01476	9.61775e-05	0.00680056	1.19183
PPP1CC	-0.802546	7.71052	-4.00926	9.82087e-05	0.00683353	1.17304
LSM6	-0.890244	7.5103	-4.00719	9.89829e-05	0.00686006	1.16598
ABCD3	-0.777165	5.21884	-4.00422	0.000100107	0.00688331	1.15583
PRDX4	-1.0106	6.58309	-3.99974	0.000101823	0.0068928	1.14055
FAM114A2	-0.506102	4.91563	-3.99496	0.000103687	0.00696705	1.12425
LY86	-1.02587	7.99675	-3.99488	0.000103718	0.00696705	1.12398
C20orf194	-0.505067	6.52618	-3.992	0.000104856	0.0070165	1.11417
PECAM1	-0.528425	9.59772	-3.98907	0.000106024	0.00706758	1.10422
NAPSB	-1.02659	6.25607	-3.98721	0.000106772	0.00709042	1.09789
SCOC	-0.774577	5.45161	-3.98005	0.000109707	0.00713127	1.07353
IMPACT	-0.732516	5.02569	-3.97659	0.000111151	0.0071642	1.06178
KCNMA1	-0.624816	5.77992	-3.97655	0.000111165	0.0071642	1.06167
FAM3B	-1.11757	7.04143	-3.97339	0.000112501	0.00722365	1.05093
SORT1	-0.598218	7.30155	-3.96483	0.000116195	0.00735267	1.02192
USO1	-0.588114	7.00768	-3.94841	0.000123604	0.00773624	0.966404
RNF135	-0.818627	6.65744	-3.9456	0.000124914	0.00773624	0.956939
C19orf70	-0.536169	6.74181	-3.93684	0.000129092	0.00781778	0.927404
GDE1	-0.66657	7.11029	-3.93332	0.000130806	0.0078777	0.91556
NDUFB1	-0.56382	10.041	-3.92381	0.000135552	0.00794746	0.883579
RTN1	-0.809271	7.15411	-3.92376	0.000135576	0.00794746	0.883417
BBS10	-1.04108	3.06951	-3.92255	0.00013619	0.00794746	0.879363
CETN3	-0.830635	5.64406	-3.92054	0.000137223	0.00794746	0.872585
DHX29	-0.629499	5.80577	-3.91998	0.000137508	0.00794746	0.870721
FUCA1	-0.973039	7.23762	-3.91746	0.000138811	0.00794746	0.862259
CD302	-0.790003	7.45919	-3.91513	0.000140023	0.00796578	0.854461
NME7	-0.509389	7.15641	-3.9107	0.000142358	0.00797843	0.83962
ITGB5	-0.749092	6.82397	-3.91003	0.000142717	0.00797843	0.837364
C4orf43	-0.769811	5.04562	-3.90923	0.000143144	0.00797843	0.834679
TGFBR2	-0.513	7.33083	-3.90847	0.000143548	0.00797843	0.832151
EXTL2	-0.615244	4.98629	-3.90687	0.000144409	0.00797843	0.82679
EIF1AY	-1.46616	4.61843	-3.90371	0.000146121	0.00797843	0.816218
SPARC	-0.97759	5.79909	-3.89597	0.000150402	0.00808236	0.79032
DPY19L4	-0.593622	4.20703	-3.89349	0.000151793	0.00812087	0.78206
TAF1A	-0.532206	3.68321	-3.89	0.000153779	0.00816337	0.770406
ATL3	-0.604519	6.13594	-3.8819	0.000158478	0.00830716	0.743418
HDAC2	-0.593429	6.91861	-3.87513	0.000162512	0.00835929	0.720886
PDP1	-0.65121	5.24096	-3.86319	0.000169863	0.00852488	0.681235
CPE	-1.17425	5.64931	-3.86036	0.000171654	0.00857151	0.671838
SSR4	-0.543877	8.81527	-3.85858	0.000172788	0.00859487	0.665935
ZNF268	-0.878747	5.04076	-3.8579	0.000173226	0.00859487	0.663667
DRAM2	-0.713527	7.24499	-3.85174	0.00017721	0.00867023	0.643296
AKT3	-0.561394	6.27047	-3.85128	0.000177513	0.00867023	0.641763
LSM7	-0.647968	6.94257	-3.85096	0.000177724	0.00867023	0.640703
SH3BGRL	-0.541287	9.52418	-3.84291	0.000183084	0.00880586	0.614084
APOC2	-0.931689	9.18796	-3.83991	0.000185123	0.00880586	0.604165
CES1	-1.21409	9.66548	-3.83336	0.000189638	0.0088609	0.582583
COX15	-0.533154	6.5151	-3.8332	0.00018975	0.0088609	0.582058
GLCE	-0.788649	4.68231	-3.82575	0.000195025	0.00899964	0.557502
SCD	-1.24455	10.159	-3.81573	0.000202337	0.00903339	0.524552
ANAPC10	-0.964074	5.9363	-3.81506	0.000202833	0.00903339	0.522363
MUT	-0.622186	5.4321	-3.81345	0.000204038	0.00903339	0.51706
JKAMP	-0.596632	5.66323	-3.8127	0.000204599	0.00903339	0.514602
ATP1B1	-0.860037	8.31504	-3.81182	0.000205262	0.00903339	0.511709
GTF2A2	-0.721996	6.91685	-3.80415	0.000211109	0.00903339	0.486571
NDUFA4	-0.63022	9.82558	-3.80296	0.00021203	0.00903339	0.482677
ATP5B	-0.506537	8.56474	-3.79937	0.000214838	0.00903339	0.470902
CCPG1	-0.518788	6.4609	-3.79704	0.000216678	0.00903339	0.463272
SAR1B	-0.589315	6.13768	-3.79615	0.000217384	0.00903339	0.460363
NDUFA11	-0.582002	7.20553	-3.79574	0.000217712	0.00903339	0.459014
ZC3H14	-0.579534	5.78271	-3.79564	0.000217792	0.00903339	0.458686
APOA1BP	-0.548218	6.90127	-3.79525	0.000218096	0.00903339	0.457438
PGGT1B	-0.770024	5.40922	-3.79415	0.000218978	0.00903339	0.453826
TBC1D4	-0.854042	6.78354	-3.79394	0.000219148	0.00903339	0.453133
NDUFB9	-0.643378	8.618	-3.79342	0.000219565	0.00903339	0.451432
CLCN4	-0.516446	4.90221	-3.78396	0.000227275	0.00922222	0.420561
TMEM219	-0.688807	6.9054	-3.77835	0.000231971	0.00927881	0.402269
AMOTL1	-0.631184	5.65783	-3.77812	0.000232169	0.00927881	0.401505
CTSC	-0.636982	9.2404	-3.7698	0.000239315	0.00943483	0.374402
PRRC1	-0.743428	6.12395	-3.76708	0.000241687	0.00948553	0.365583
ETFA	-0.679173	6.86197	-3.7655	0.000243082	0.00949761	0.360437
SPAST	-0.520628	5.11942	-3.7643	0.000244149	0.00950775	0.356523
HDDC2	-0.924348	5.52242	-3.76276	0.000245519	0.00950775	0.351519
RBMX	-0.558444	5.83814	-3.75971	0.000248249	0.00954994	0.341635
PSMC2	-0.616765	6.72916	-3.75688	0.000250814	0.00958525	0.332449
PLA2G16	-0.771251	6.25202	-3.75597	0.000251643	0.00959594	0.3295
FBXO45	-0.524854	5.44133	-3.75532	0.000252238	0.00959769	0.327387
IPO7	-0.562454	6.83602	-3.75037	0.000256804	0.00970797	0.311355
LOC100287552	-0.723815	5.08641	-3.74872	0.000258351	0.00971367	0.305989
EHHADH	-0.694141	4.04371	-3.74078	0.000265887	0.00983852	0.280298
DHRS3	-0.595403	7.43839	-3.73514	0.000271359	0.0098797	0.2621
CYB5R2	-0.754414	5.25002	-3.73497	0.000271529	0.0098797	0.261539
FAM175B	-0.520286	5.53212	-3.73439	0.000272103	0.00988001	0.259652
SLC47A1	-1.1662	7.42812	-3.73061	0.000275837	0.00988601	0.24748
GLB1	-0.655663	8.53532	-3.72638	0.000280087	0.00988601	0.233823
NAE1	-0.501588	6.12568	-3.72571	0.000280759	0.00988601	0.231683
VAMP8	-0.753676	9.67195	-3.72187	0.000284678	0.00998374	0.219304
TMEM14B	-0.633148	6.61179	-3.72125	0.00028531	0.00998586	0.217324
ALDH2	-0.827746	10.8689	-3.7197	0.000286916	0.010002	0.212313
ALDH1A1	-1.04564	8.52652	-3.71797	0.000288711	0.0100245	0.206743
FTO	-1.0025	6.0215	-3.70891	0.000298276	0.0102262	0.177646
WRB	-0.53203	5.91459	-3.70847	0.000298749	0.0102262	0.176231
BMPR1A	-0.794668	3.16204	-3.70546	0.000301997	0.0102415	0.166578
DNAJA3	-0.514683	5.73924	-3.70295	0.000304732	0.0102497	0.158532
DECR1	-0.560915	8.47277	-3.7012	0.000306656	0.0102497	0.152915
SLC25A46	-0.731749	6.07883	-3.70094	0.000306946	0.0102497	0.152071
PROS1	-0.919588	6.65251	-3.69902	0.000309062	0.0102497	0.145941
FAM188A	-0.619005	5.00844	-3.69406	0.000314614	0.0102942	0.130052
ZNF192	-0.714125	4.82514	-3.69391	0.000314784	0.0102942	0.129569
TMEFF1	-0.736027	3.62528	-3.68946	0.000319848	0.0103256	0.115329
DNAJC10	-0.534874	5.75647	-3.6814	0.000329212	0.0104215	0.0895883
ESF1	-0.610288	5.71064	-3.68119	0.000329453	0.0104215	0.088936
OSBPL11	-0.651538	7.11629	-3.68059	0.000330162	0.0104215	0.0870183
BAG4	-0.626566	5.12124	-3.67973	0.000331178	0.0104215	0.0842781
FKBP9	-0.50413	6.61089	-3.67608	0.000335534	0.0104215	0.0726225
NR1D2	-0.658606	4.90586	-3.67195	0.000340522	0.0104704	0.0594628
LMAN1	-0.563997	5.88056	-3.66714	0.000346413	0.0105751	0.0441671
PPIC	-1.02663	7.47738	-3.66466	0.000349494	0.0105787	0.0362738
ALDH3A2	-0.753164	7.10338	-3.66063	0.000354547	0.0106119	0.0234751
PRRG1	-0.558201	4.27203	-3.66058	0.000354609	0.0106119	0.0233189
AMFR	-0.56394	6.02039	-3.65896	0.000356666	0.0106119	0.0181622
FIS1	-0.508667	7.4827	-3.65595	0.000360506	0.0106716	0.00861645
COX7A2L	-0.566339	8.13321	-3.64941	0.000368997	0.0107588	-0.0121325
C1orf59	-0.903811	4.78751	-3.64686	0.000372357	0.0108207	-0.0202102
HIBADH	-0.939339	6.71213	-3.64549	0.000374162	0.0108551	-0.0245208
SCP2	-0.730507	7.88865	-3.63574	0.000387337	0.0111444	-0.0553529
SLC30A1	-0.640928	6.11708	-3.63366	0.000390213	0.0111593	-0.0619426
ZNF480	-0.635389	3.92563	-3.63347	0.000390464	0.0111593	-0.0625156
RPAP3	-0.628165	5.18339	-3.63306	0.000391038	0.0111593	-0.0638243
PEX13	-0.531402	4.73553	-3.62928	0.000396306	0.0112544	-0.0757449
CCT5	-0.553592	8.9949	-3.61998	0.000409562	0.0114815	-0.105047
NUPR1	-0.873972	9.42627	-3.61726	0.000413517	0.0115258	-0.113604
SNX2	-0.69168	8.52557	-3.61708	0.000413782	0.0115258	-0.114175
RPS5	-0.587926	8.99025	-3.6086	0.000426354	0.0116896	-0.140822
ROMO1	-0.607886	8.6242	-3.60488	0.000431978	0.0117699	-0.152485
C2orf64	-0.590439	5.81025	-3.60167	0.000436888	0.0118666	-0.162546
GCHFR	-0.969337	8.47664	-3.59878	0.000441369	0.0118775	-0.171628
2022-03-01	-0.59095	5.51038	-3.59411	0.000448669	0.0119369	-0.186225
HLA-DMA	-0.628598	9.66831	-3.59383	0.000449118	0.0119369	-0.187115
TMEM5	-0.608816	4.25773	-3.59168	0.000452531	0.0119749	-0.19385
PON2	-0.577089	4.72321	-3.58981	0.000455506	0.0120341	-0.19968
MPZL2	-0.733948	5.27751	-3.58941	0.000456146	0.0120341	-0.20093
LEPROTL1	-0.57162	7.97885	-3.58211	0.000467985	0.0121809	-0.223723
LOC729082	-0.746749	5.75713	-3.57746	0.000475679	0.0123078	-0.238228
GAA	-0.585077	7.93258	-3.5725	0.000484022	0.0124498	-0.25369
TMED3	-0.59084	6.69811	-3.5652	0.000496543	0.01266	-0.276399
GORASP2	-0.603757	6.75981	-3.56329	0.000499855	0.0126766	-0.282308
KMO	-0.70632	7.62445	-3.56282	0.000500682	0.0126766	-0.283778
HCCS	-0.574996	5.37463	-3.56234	0.00050152	0.0126766	-0.285264
SRD5A3	-0.751701	5.21717	-3.56118	0.00050356	0.0126766	-0.288874
LANCL1	-0.532026	5.55169	-3.55249	0.000519064	0.0129057	-0.315826
RAB28	-0.529044	5.31301	-3.54189	0.000538591	0.0132149	-0.348639
GPR22	-0.58063	4.80139	-3.54141	0.000539492	0.0132149	-0.350125
ZNF570	-0.723494	4.61555	-3.53841	0.000545141	0.0132623	-0.359379
SLC12A2	-0.534356	4.27119	-3.53636	0.000549043	0.0133181	-0.365715
COQ9	-0.605544	5.74856	-3.53395	0.000553665	0.0133743	-0.37316
NDUFAB1	-0.616	8.28378	-3.53153	0.000558341	0.013405	-0.380629
NME1	-0.63747	7.0944	-3.52597	0.000569214	0.0135793	-0.397758
ZCRB1	-0.52617	7.09051	-3.5235	0.00057411	0.0136234	-0.405362
TOMM20	-0.581733	7.69	-3.51976	0.0005816	0.0136994	-0.416871
WDR7	-0.70427	5.99393	-3.51859	0.000583959	0.0137004	-0.420464
PRDX3	-0.558074	8.06486	-3.51798	0.000585198	0.0137004	-0.422346
ABCE1	-0.600643	7.13279	-3.51538	0.000590487	0.0137688	-0.430333
SLC29A3	-0.70603	6.38826	-3.50967	0.000602255	0.0139707	-0.447849
YWHAG	-0.511584	9.19061	-3.50492	0.000612221	0.014047	-0.462415
ABCG1	-0.696334	8.28214	-3.50399	0.000614201	0.014047	-0.46528
MS4A7	-0.771483	9.35572	-3.50386	0.000614479	0.014047	-0.465682
LY75	-0.690756	6.6134	-3.50224	0.000617913	0.0140886	-0.470626
INTS2	-0.765725	4.40175	-3.49508	0.000633376	0.0143104	-0.492556
ACO1	-0.726221	8.31541	-3.48984	0.000644897	0.0144584	-0.508546
VPS41	-0.582307	5.53056	-3.48608	0.000653313	0.0145537	-0.520046
SETD7	-0.716556	6.33634	-3.48527	0.000655126	0.0145755	-0.522503
PCK2	-0.665824	7.7883	-3.48343	0.000659272	0.0146491	-0.528098
MLEC	-0.527066	7.26148	-3.48249	0.000661409	0.0146623	-0.530967
SLCO2B1	-0.582719	7.08844	-3.47864	0.000670229	0.0147611	-0.542714
SCARB2	-0.563719	7.18302	-3.47769	0.00067241	0.0147905	-0.545595
PLD3	-0.626676	8.44869	-3.47697	0.00067407	0.0148083	-0.54778
PRDX1	-0.591113	9.56361	-3.47565	0.000677151	0.0148547	-0.551824
NDUFB5	-0.737335	7.56718	-3.47533	0.000677881	0.0148547	-0.552779
ZNF185	-0.546994	7.0969	-3.47314	0.000682992	0.0148959	-0.559438
F8	-0.570681	4.22909	-3.47231	0.000684945	0.0148959	-0.561969
ENPP3	-0.551758	5.47963	-3.46808	0.000694963	0.0149846	-0.57484
HAUS1	-0.761728	4.50502	-3.46585	0.000700274	0.0150481	-0.581589
ASCC3	-0.669598	6.03057	-3.45987	0.000714766	0.0152036	-0.599741
BCAR3	-0.687603	5.30639	-3.45977	0.000715018	0.0152036	-0.600054
PNPLA2	-0.554577	6.96292	-3.45841	0.000718333	0.0152069	-0.604152
TEX14	-0.600125	5.94173	-3.45748	0.00072062	0.0152368	-0.606969
DYNLL1	-0.552619	9.46619	-3.45514	0.000726419	0.0152732	-0.61407
LARP1	-0.511217	7.2989	-3.45151	0.000735482	0.0152732	-0.625055
REEP3	-0.715399	7.07039	-3.45064	0.000737675	0.0152732	-0.627693
CRYBG3	-0.813183	6.25141	-3.4459	0.000749696	0.0154041	-0.642011
GSTP1	-0.603826	9.3709	-3.43867	0.000768412	0.0156336	-0.663848
GGA2	-0.519061	7.81171	-3.43643	0.000774293	0.0156336	-0.6706
PEBP1	-0.79269	8.54118	-3.43398	0.000780771	0.015728	-0.677977
FAM3C	-0.681422	7.1326	-3.43307	0.000783188	0.0157454	-0.680713
APOO	-0.544327	5.2034	-3.42729	0.000798753	0.0159796	-0.698134
DHRS9	-0.568722	6.90082	-3.42355	0.000808947	0.0160731	-0.709359
CLNS1A	-0.680086	6.69679	-3.41742	0.000825948	0.0163527	-0.727765
TPRKB	-0.825201	5.45652	-3.41713	0.000826764	0.0163527	-0.728639
TCEAL8	-0.861306	5.25805	-3.41465	0.000833747	0.016435	-0.736081
SNRPE	-0.583771	8.77737	-3.41033	0.000846026	0.0165321	-0.749016
EBNA1BP2	-0.521441	7.09068	-3.41026	0.000846245	0.0165321	-0.749244
HSPB8	-0.650977	5.60302	-3.4094	0.000848711	0.0165617	-0.751819
DPY30	-0.683504	7.32157	-3.40541	0.000860243	0.0166693	-0.763757
EPB41L4A	-0.596894	4.7185	-3.4042	0.000863767	0.0166693	-0.767373
ASRGL1	-0.520793	5.28407	-3.40351	0.000865782	0.0166897	-0.769434
WDSUB1	-0.611125	6.03736	-3.40141	0.000871936	0.0167463	-0.775698
ING2	-0.533932	6.08383	-3.39644	0.000886695	0.0168511	-0.790542
CRISP3	-0.91399	4.71193	-3.38928	0.00090838	0.0170957	-0.811904
TANC2	-0.655504	5.3132	-3.38682	0.000915935	0.0171535	-0.819226
VTI1B	-0.524213	6.49829	-3.37807	0.000943313	0.0174154	-0.845257
PPCS	-0.660005	7.21933	-3.3709	0.00096633	0.0175619	-0.866558
DPYSL2	-0.58793	9.83446	-3.36538	0.00098437	0.0177603	-0.882898
CUTC	-0.681327	4.59863	-3.35875	0.00100651	0.0179786	-0.902544
C12orf52	-0.503577	3.93736	-3.35854	0.00100721	0.0179786	-0.903155
KLHDC8B	-0.590348	6.72252	-3.35557	0.00101728	0.018074	-0.911937
AVPI1	-0.672683	8.18094	-3.35045	0.00103483	0.0182228	-0.927044
NDUFA8	-0.710471	7.06447	-3.35032	0.00103527	0.0182228	-0.927421
PDCD6IP	-0.51828	7.26274	-3.34979	0.00103713	0.0182228	-0.929004
FAM111A	-0.526611	7.71131	-3.34883	0.00104045	0.0182353	-0.931824
DLAT	-0.634485	5.21126	-3.34868	0.00104097	0.0182353	-0.932267
ACTL6A	-0.715786	3.88799	-3.34561	0.00105172	0.0183315	-0.941331
LYPLAL1	-0.630712	6.6811	-3.34398	0.00105743	0.0183534	-0.946116
LHPP	-0.503528	5.2322	-3.34008	0.00107128	0.0184352	-0.957596
ACADM	-0.743413	5.72827	-3.33963	0.00107289	0.0184352	-0.958921
TNFSF13	-0.755714	8.27563	-3.33888	0.00107559	0.0184352	-0.961143
SLC46A3	-0.788707	6.50876	-3.33863	0.00107648	0.0184352	-0.961875
TMEM14A	-0.836518	6.22145	-3.33744	0.00108075	0.0184352	-0.965362
UQCRH	-0.538422	9.11891	-3.33738	0.00108099	0.0184352	-0.965564
C1orf31	-0.839292	7.12002	-3.33578	0.00108676	0.0184633	-0.970258
WDYHV1	-0.51986	4.45271	-3.33346	0.0010952	0.0184798	-0.977088
ZNF83	-0.688593	5.81712	-3.33341	0.00109538	0.0184798	-0.977232
BEX4	-0.603689	6.45968	-3.33029	0.00110679	0.0185283	-0.986374
ERMP1	-0.599282	6.10482	-3.32866	0.00111282	0.018558	-0.991167
PHYH	-1.04935	6.56907	-3.32429	0.00112911	0.0186565	-1.00398
USMG5	-0.52943	9.3772	-3.3227	0.00113508	0.0186844	-1.00864
KRT78	-0.879703	5.67581	-3.32236	0.0011364	0.0186885	-1.00966
KIF16B	-0.595821	5.71829	-3.32174	0.00113873	0.0187093	-1.01147
KIAA0528	-0.678968	6.78876	-3.32115	0.00114094	0.0187157	-1.01318
TMPRSS11D	-0.642633	6.41033	-3.31993	0.00114559	0.0187167	-1.01676
SLFN11	-0.542302	8.15917	-3.31803	0.00115286	0.0187648	-1.02234
CDR1	-0.768249	6.47261	-3.31482	0.00116519	0.0189478	-1.03172
C2orf28	-0.678079	7.53262	-3.30792	0.00119213	0.0192782	-1.05187
TMEM184C	-0.59786	6.70253	-3.29968	0.00122509	0.0196475	-1.07591
AOC3	-1.20705	7.3654	-3.29187	0.0012571	0.0198786	-1.09864
IDH1	-0.723181	7.32646	-3.28867	0.00127043	0.0199892	-1.10793
COX16	-0.568617	6.24977	-3.28374	0.00129123	0.0201752	-1.12223
CD74	-0.538371	11.4008	-3.28142	0.00130116	0.0202719	-1.12898
PHB2	-0.513316	7.38458	-3.28036	0.00130571	0.0203066	-1.13205
CTR9	-0.775466	5.42401	-3.27498	0.00132899	0.020394	-1.14761
FAM82A2	-0.814922	8.8504	-3.27376	0.00133435	0.0204424	-1.15115
WDR12	-0.63572	6.51258	-3.27099	0.00134656	0.0205386	-1.15917
NDUFB2	-0.517614	9.29237	-3.26984	0.00135164	0.0205686	-1.16249
MARCO	-0.873557	10.1271	-3.26976	0.001352	0.0205686	-1.16272
ELP3	-0.552076	6.43713	-3.26866	0.00135689	0.020595	-1.1659
LOC100288944	-0.772253	4.72902	-3.26857	0.00135727	0.020595	-1.16615
LDHB	-0.868747	9.38317	-3.26798	0.00135992	0.0205979	-1.16786
RNASEH2A	-0.51271	5.215	-3.26719	0.00136345	0.0205992	-1.17014
SYNJ2BP	-0.561098	5.06249	-3.26143	0.00138944	0.0208495	-1.18676
APIP	-0.693701	6.78137	-3.26077	0.00139245	0.0208557	-1.18867
TTC3	-0.518609	6.60149	-3.25969	0.00139739	0.0208771	-1.19178
FAM102B	-0.787991	7.2604	-3.25887	0.00140114	0.0209153	-1.19414
LCE3D	-0.516971	4.87116	-3.25804	0.00140498	0.0209275	-1.19655
LOC550643	-0.591688	5.75024	-3.2576	0.00140699	0.0209275	-1.19781
NDUFS1	-0.510642	6.38349	-3.2546	0.00142088	0.0210335	-1.20645
GLT8D1	-0.556792	5.35499	-3.25316	0.00142758	0.0210936	-1.21059
NIT2	-0.633532	6.9979	-3.25083	0.00143853	0.0211012	-1.21731
ARMC10	-0.560995	7.29098	-3.24839	0.00145006	0.021175	-1.22433
PGM3	-0.530582	5.3882	-3.23985	0.00149105	0.0214989	-1.24884
VWA5A	-0.607919	6.49156	-3.23505	0.00151453	0.0216893	-1.26258
C20orf30	-0.578619	8.44574	-3.23494	0.00151509	0.0216893	-1.2629
NOL11	-0.626103	5.66	-3.23429	0.00151829	0.0217174	-1.26476
BLVRA	-0.560919	8.03869	-3.23203	0.00152951	0.0218422	-1.27123
LSM3	-0.547582	7.61261	-3.23086	0.00153537	0.0218984	-1.27459
ANKRD27	-0.514083	5.79908	-3.23003	0.0015395	0.0218984	-1.27695
METTL5	-0.636307	6.3284	-3.22871	0.00154616	0.0219167	-1.28074
PFAS	-0.709248	5.40752	-3.22824	0.00154854	0.0219167	-1.2821
SUMF2	-0.612307	8.59981	-3.22583	0.00156069	0.0219829	-1.28897
psiTPTE22	-0.628691	5.05006	-3.22535	0.00156316	0.0219988	-1.29035
PKD2	-0.868681	5.6525	-3.22412	0.00156941	0.0220335	-1.29386
PSMA3	-0.532325	8.24693	-3.21729	0.00160463	0.0222243	-1.31336
BPGM	-0.792852	4.69493	-3.21614	0.00161063	0.0222721	-1.31664
MS4A4A	-0.642765	8.12603	-3.2127	0.00162866	0.0223598	-1.32641
MRPL48	-0.585734	6.06467	-3.21058	0.00163991	0.0224636	-1.33246
IER3IP1	-0.531593	7.29846	-3.20626	0.001663	0.0227264	-1.34474
NDUFA12	-0.555189	8.31484	-3.20409	0.00167473	0.0227949	-1.35091
SLC31A1	-0.612783	8.87781	-3.20362	0.0016773	0.0227949	-1.35226
C2orf74	-0.833901	6.07065	-3.20307	0.00168027	0.0227949	-1.35381
PGM1	-0.534307	6.88776	-3.20292	0.00168107	0.0227949	-1.35423
GPRIN3	-0.848774	6.78579	-3.1954	0.00172241	0.02314	-1.37555
SPNS2	-0.601665	4.94713	-3.19194	0.00174177	0.0232582	-1.38536
SEPT11	-0.603171	6.92661	-3.19003	0.00175255	0.0232763	-1.39078
RPE	-0.526647	6.15283	-3.18289	0.00179334	0.0235671	-1.41096
RG9MTD1	-0.506334	6.80969	-3.18183	0.00179945	0.0236118	-1.41394
CEACAM21	-0.540207	5.66927	-3.17979	0.00181131	0.0236432	-1.41971
KCTD3	-0.635844	2.4865	-3.17396	0.00184562	0.0238945	-1.43616
ARL2BP	-0.524754	5.99025	-3.17354	0.00184807	0.0239085	-1.43733
MRPS23	-0.681397	6.79675	-3.17209	0.00185675	0.0239498	-1.44144
NUCB2	-0.650596	7.08927	-3.1719	0.00185784	0.0239498	-1.44195
LOC728613	-1.24948	5.44966	-3.1704	0.00186684	0.0239767	-1.44619
PEX1	-0.500222	4.66144	-3.16873	0.00187687	0.0240672	-1.45089
CHID1	-0.512189	7.04779	-3.16627	0.00189172	0.0241866	-1.45779
PTPRM	-0.506001	5.54342	-3.16395	0.00190584	0.0242747	-1.46431
FUBP3	-0.762581	5.93373	-3.16323	0.00191028	0.0242817	-1.46635
ALG14	-0.774322	4.25811	-3.1614	0.00192152	0.024336	-1.47149
MTX2	-0.5501	5.61468	-3.15903	0.00193613	0.0244501	-1.47813
ASB13	-0.651225	6.09362	-3.15397	0.00196773	0.0246334	-1.49232
TFRC	-0.546179	11.2387	-3.15368	0.00196961	0.0246334	-1.49316
UQCRQ	-0.508446	7.92128	-3.14793	0.0020061	0.024831	-1.50924
TMEM106B	-0.623863	6.53176	-3.14526	0.00202327	0.0249386	-1.5167
NARS	-0.538294	7.90463	-3.14367	0.0020336	0.0249592	-1.52116
SAC3D1	-0.842748	6.65592	-3.14299	0.00203801	0.0249957	-1.52306
AMZ2P1	-0.544744	5.36608	-3.14141	0.00204832	0.0251045	-1.52748
IARS	-0.636169	6.75222	-3.13959	0.00206023	0.0251883	-1.53256
ACER3	-0.695513	6.83237	-3.1391	0.00206343	0.0252013	-1.53392
STARD7	-0.506294	8.42293	-3.13824	0.00206912	0.0252119	-1.53633
LACTB2	-0.645132	4.77196	-3.13442	0.00209442	0.0253494	-1.54697
VSIG4	-0.750079	9.50982	-3.13303	0.00210374	0.0254093	-1.55085
MGST3	-0.702335	9.31518	-3.1315	0.00211398	0.0254977	-1.5551
TMEM14C	-0.803853	7.51812	-3.13069	0.00211943	0.0255101	-1.55736
ZBTB41	-0.502919	5.81018	-3.12815	0.00213663	0.0255766	-1.56443
MTR	-0.593229	5.16016	-3.12635	0.00214894	0.0256887	-1.56946
MRPL32	-0.622493	6.34549	-3.12091	0.00218638	0.0258894	-1.58457
NUP107	-0.672729	6.81265	-3.1202	0.00219128	0.0259153	-1.58653
COMMD6	-0.517705	8.84909	-3.11684	0.00221477	0.0259952	-1.59586
UBE2E2	-0.747051	6.76083	-3.11501	0.00222769	0.0260682	-1.60095
KIAA0562	-0.561679	5.29731	-3.11188	0.00224988	0.0261648	-1.60962
RABGGTB	-0.566815	7.09343	-3.11142	0.00225319	0.0261648	-1.6109
ALDH1A3	-0.943016	4.28317	-3.11074	0.00225798	0.0261945	-1.61276
ZNF331	-0.641107	7.75548	-3.10966	0.00226577	0.0261945	-1.61577
ALDH9A1	-0.631136	6.81065	-3.10763	0.00228038	0.0263405	-1.62139
PCOLCE2	-1.12934	7.98013	-3.10695	0.00228529	0.0263449	-1.62327
SPCS1	-0.504726	7.88011	-3.10448	0.00230322	0.0264527	-1.63011
CDKN2AIP	-0.721193	5.69752	-3.10287	0.00231491	0.0265115	-1.63454
KIAA0776	-0.650605	5.86985	-3.0991	0.00234269	0.0267069	-1.64496
RPS4Y1	-1.40183	7.58931	-3.09864	0.00234606	0.026728	-1.64622
DST	-0.52021	6.24715	-3.09716	0.00235707	0.026787	-1.65031
KIAA1143	-0.595694	6.56942	-3.09589	0.00236652	0.026796	-1.65381
TRNP1	-0.652526	4.63418	-3.09476	0.00237502	0.0268103	-1.65694
EID1	-0.524123	6.99915	-3.09458	0.00237632	0.0268103	-1.65742
RIOK1	-0.507296	5.08037	-3.0936	0.0023837	0.0268174	-1.66013
RHOU	-0.591222	6.63473	-3.09225	0.00239387	0.0268868	-1.66385
PPDPF	-0.518442	8.80059	-3.09161	0.00239869	0.026905	-1.66561
C4orf41	-0.650631	4.64864	-3.08854	0.00242203	0.0270293	-1.67407
PIGW	-0.863827	4.12021	-3.08271	0.00246686	0.0273201	-1.69009
SLC25A43	-0.962832	5.583	-3.08174	0.00247442	0.0273557	-1.69276
CCDC88A	-0.598285	7.30957	-3.07828	0.00250146	0.0274595	-1.70226
DPEP2	-0.513977	8.88628	-3.07371	0.00253765	0.0276963	-1.7148
DNAJC15	-0.547022	7.08799	-3.07117	0.00255794	0.027811	-1.72175
THAP10	-0.654492	3.87283	-3.06795	0.00258388	0.0279525	-1.73056
COLEC12	-0.976805	7.27374	-3.06533	0.00260521	0.0280691	-1.73774
SPRED1	-1.02074	5.53566	-3.05943	0.0026538	0.0282442	-1.75386
CROT	-0.71346	4.51163	-3.05863	0.00266044	0.0282976	-1.75604
AXL	-0.699776	7.96982	-3.05693	0.00267457	0.0283615	-1.76066
FMNL2	-0.683133	8.22054	-3.05019	0.0027315	0.0286633	-1.77904
TUSC1	-0.671112	5.41457	-3.04983	0.00273458	0.0286671	-1.78002
PDCD1LG2	-0.536576	5.90949	-3.04841	0.00274674	0.0287202	-1.78389
CPNE3	-0.587951	6.51795	-3.04828	0.00274787	0.0287202	-1.78425
TMEM106C	-0.521364	5.96404	-3.04456	0.00277996	0.0288485	-1.79437
C5orf43	-0.736976	6.46467	-3.04232	0.00279938	0.0289059	-1.80044
PTER	-0.505715	4.37699	-3.04222	0.00280022	0.0289059	-1.8007
RND3	-0.776703	7.83613	-3.03863	0.00283173	0.029109	-1.81046
MARVELD1	-0.548193	7.53288	-3.03834	0.00283431	0.0291184	-1.81125
AMIGO2	-0.989868	7.51628	-3.03597	0.0028553	0.0291795	-1.81768
GOT2	-0.566835	6.21737	-3.03466	0.00286697	0.0292354	-1.82124
ENOSF1	-0.532616	6.83736	-3.0346	0.00286747	0.0292354	-1.82139
GALNT12	-0.675685	5.74232	-3.0314	0.00289614	0.0293973	-1.83006
C3orf64	-0.588826	5.29356	-3.03046	0.00290457	0.0294418	-1.8326
THUMPD1	-0.547282	5.68254	-3.03023	0.00290667	0.029446	-1.83323
PEX19	-0.534374	6.50408	-3.02715	0.00293459	0.0296601	-1.84155
HMGN3	-0.792295	7.75411	-3.01912	0.00300864	0.0301814	-1.86326
C1orf57	-0.618698	5.83911	-3.01523	0.00304507	0.0303373	-1.87375
FASTKD3	-0.54982	5.01244	-3.01265	0.00306953	0.0303712	-1.88071
TSPAN6	-0.640916	5.24379	-3.01188	0.00307685	0.0303947	-1.88278
SCGB1A1	-1.15504	7.31947	-3.01187	0.00307689	0.0303947	-1.8828
SSB	-0.596629	8.32595	-3.00009	0.00319089	0.0310591	-1.91446
FBP1	-0.63437	9.40851	-2.99996	0.00319216	0.0310591	-1.91481
NSL1	-0.60145	6.20685	-2.99957	0.00319608	0.0310799	-1.91588
POLE3	-0.526197	4.78133	-2.99928	0.00319894	0.0310904	-1.91665
RAD51AP1	-0.824319	3.86449	-2.99843	0.00320731	0.0310985	-1.91893
TMEM218	-0.51575	5.76451	-2.99577	0.00323365	0.031238	-1.92604
GPN3	-0.55243	5.38381	-2.99504	0.00324095	0.031238	-1.92801
MTM1	-0.597959	5.42086	-2.9929	0.00326236	0.031358	-1.93373
MRPL13	-0.749463	6.36538	-2.98778	0.00331421	0.0316091	-1.94745
FTSJD1	-0.576424	5.36291	-2.98764	0.00331565	0.0316091	-1.94783
PECI	-0.548081	4.92988	-2.986	0.00333237	0.031682	-1.9522
C14orf129	-0.656311	5.60768	-2.98323	0.00336086	0.0318661	-1.9596
NARG2	-0.66374	5.56622	-2.97454	0.00345167	0.032434	-1.98278
GLRX2	-0.567211	7.04109	-2.96376	0.00356747	0.0329138	-2.01145
PDZD11	-0.523658	6.28293	-2.96041	0.00360415	0.0330719	-2.02033
ABHD15	-0.559774	4.83047	-2.96029	0.00360543	0.0330719	-2.02064
BBS2	-0.567034	6.75705	-2.95858	0.00362438	0.0331934	-2.0252
DCUN1D5	-0.53608	6.44106	-2.95628	0.00364991	0.0333049	-2.03129
KIAA1598	-0.578945	7.99079	-2.95412	0.00367406	0.0334063	-2.03702
NUS1	-0.572941	7.72034	-2.95114	0.00370755	0.0336027	-2.04489
EPAS1	-0.653096	7.70222	-2.94988	0.00372178	0.0336269	-2.04822
RBP4	-0.803139	8.2238	-2.94874	0.0037347	0.033674	-2.05123
DUOX2	-0.69658	5.05746	-2.94577	0.00376864	0.0338402	-2.05908
CCDC6	-0.60089	6.6832	-2.94011	0.00383406	0.034047	-2.07401
NHP2	-0.502217	7.42933	-2.93811	0.0038574	0.0341497	-2.07928
RPF2	-0.558752	7.21524	-2.93774	0.00386176	0.0341497	-2.08026
TCEAL4	-0.853508	7.61649	-2.93738	0.00386605	0.0341522	-2.08122
BTBD10	-0.56595	6.10436	-2.93722	0.00386791	0.0341522	-2.08164
CLCA4	-0.79749	3.33205	-2.93201	0.00392948	0.0345039	-2.09534
TIMM9	-0.57218	5.74415	-2.93167	0.00393361	0.0345088	-2.09625
TDRD3	-0.821928	6.09863	-2.92982	0.00395573	0.0345902	-2.10111
C7orf30	-0.627363	7.4374	-2.92607	0.00400085	0.0347118	-2.11095
MRPL19	-0.616533	5.60427	-2.91481	0.0041395	0.0355091	-2.14048
CCDC43	-0.574311	5.59834	-2.91313	0.00416056	0.0356354	-2.14487
ANKMY2	-0.63491	5.75481	-2.91208	0.00417375	0.0356802	-2.14761
RFK	-0.568711	6.29875	-2.91062	0.00419218	0.0357677	-2.15143
ZNF589	-0.54128	5.81762	-2.91045	0.00419427	0.035768	-2.15186
ATP2C1	-0.658511	6.44119	-2.90872	0.0042162	0.0359375	-2.15638
NGRN	-0.512114	7.52501	-2.90744	0.0042325	0.0360237	-2.15972
C12orf62	-0.516595	7.40294	-2.90672	0.00424175	0.036083	-2.16161
EXOC5	-0.55498	5.99142	-2.90639	0.00424602	0.036086	-2.16249
FAR2	-0.509768	7.22807	-2.90454	0.00426967	0.0361814	-2.1673
PPIL3	-0.752691	6.10732	-2.90088	0.00431694	0.0364053	-2.17683
MOSPD1	-0.500087	5.65238	-2.89763	0.00435946	0.03664	-2.18531
SGMS1	-0.686883	5.71949	-2.89489	0.00439551	0.0368013	-2.19244
CD36	-0.55644	7.22179	-2.89125	0.00444377	0.0370477	-2.2019
NDUFB4	-0.533803	8.9246	-2.88659	0.00450638	0.037271	-2.214
RRM2B	-0.595523	6.02768	-2.88379	0.00454426	0.0375073	-2.22124
PNMA1	-0.646343	6.68295	-2.88296	0.00455566	0.0375837	-2.22341
SLC35A1	-0.559448	6.13978	-2.88141	0.00457684	0.0376517	-2.22742
CCDC56	-0.575227	7.60711	-2.88052	0.00458898	0.037716	-2.22972
NNT	-0.626047	5.36612	-2.87989	0.0045977	0.0377528	-2.23136
AGL	-0.703601	4.84624	-2.87844	0.00461772	0.0378378	-2.23512
TUBE1	-0.548008	4.02033	-2.87772	0.00462766	0.0378558	-2.23698
C1orf54	-0.53777	6.11039	-2.87689	0.00463909	0.0378813	-2.23911
C1QA	-0.600859	9.90076	-2.86916	0.00474752	0.0382628	-2.25909
APOC1	-0.582535	12.3189	-2.86807	0.00476305	0.0382996	-2.26191
VGLL3	-0.706463	3.34059	-2.86523	0.00480354	0.0384481	-2.26922
CISD2	-0.511388	7.32215	-2.86224	0.00484658	0.0386902	-2.27693
P2RY1	-0.699592	6.14389	-2.85832	0.00490346	0.038921	-2.28701
FUCA2	-0.554278	7.09909	-2.85822	0.00490497	0.038921	-2.28728
MRPL50	-0.586086	5.28848	-2.85388	0.0049687	0.0392035	-2.29843
RPS27L	-0.53251	9.65088	-2.85018	0.00502356	0.0394601	-2.30791
RWDD3	-0.686248	5.37328	-2.83952	0.00518494	0.0401883	-2.33521
TREM2	-0.507539	7.31674	-2.83745	0.00521685	0.0402451	-2.34051
SEL1L3	-0.553736	5.71007	-2.83596	0.00523989	0.0403508	-2.34431
TOMM5	-0.532816	7.70678	-2.83575	0.0052432	0.0403508	-2.34485
GPN1	-0.538383	6.10922	-2.82591	0.00539791	0.040892	-2.36994
C12orf5	-0.59539	5.79976	-2.8188	0.00551242	0.041444	-2.38804
DLD	-0.599014	6.93999	-2.81677	0.00554539	0.0416256	-2.39318
C1orf174	-0.77516	6.07369	-2.81266	0.0056129	0.0418571	-2.40361
CIRH1A	-0.763826	6.51077	-2.80807	0.00568918	0.0422097	-2.41524
NUP37	-0.62781	5.59809	-2.80383	0.0057605	0.042547	-2.42597
FAM98A	-0.588011	6.61191	-2.80377	0.00576145	0.042547	-2.42611
HLTF	-0.582693	5.59254	-2.79927	0.00583797	0.0428914	-2.43747
C1QBP	-0.545413	6.9388	-2.79882	0.00584576	0.0429156	-2.43862
SAMM50	-0.672911	6.93319	-2.79702	0.00587663	0.0430698	-2.44316
CYP27A1	-0.514644	10.2208	-2.79681	0.00588028	0.0430785	-2.44369
ZNF271	-0.569961	4.97546	-2.79539	0.00590479	0.0431635	-2.44727
CDCA7L	-0.55761	6.60688	-2.79425	0.00592445	0.0432389	-2.45014
UBE2D4	-0.530975	6.16061	-2.79031	0.00599324	0.0434693	-2.46007
DENND4C	-0.688313	7.13033	-2.78452	0.00609547	0.0438457	-2.47463
IL18	-0.707333	6.50586	-2.78286	0.00612508	0.0440224	-2.4788
PCNA	-0.595689	6.02503	-2.77286	0.00630627	0.0447766	-2.50387
PPARG	-0.596898	8.1683	-2.77254	0.00631226	0.0447963	-2.50468
ABCB10	-0.680057	5.61042	-2.77204	0.00632144	0.0448073	-2.50593
LOC100132319	-0.594486	5.47373	-2.76874	0.00638234	0.0451286	-2.51418
PNPT1	-0.530025	5.36061	-2.76519	0.00644865	0.0453587	-2.52306
ZCCHC9	-0.612425	5.79467	-2.76196	0.00650942	0.0455665	-2.53112
TMPRSS11B	-1.04688	3.78225	-2.76045	0.006538	0.0456927	-2.53488
ZNF468	-0.564051	4.68763	-2.75984	0.00654952	0.0457183	-2.5364
ZFYVE26	-0.535228	7.65591	-2.75498	0.00664251	0.0460939	-2.54851
C17orf39	-0.589832	4.8082	-2.75325	0.00667592	0.0461945	-2.55282
FAM89A	-0.855979	8.06289	-2.75017	0.00673562	0.046387	-2.56046
C2orf76	-0.597629	5.56244	-2.7486	0.00676633	0.0464703	-2.56437
GMPS	-0.54402	6.54195	-2.74794	0.00677937	0.04651	-2.56602
ZW10	-0.514583	5.00012	-2.74641	0.0068093	0.0465953	-2.5698
RAB7B	-0.53948	7.30061	-2.74571	0.00682316	0.0465953	-2.57155
MSR1	-0.766554	9.80987	-2.74415	0.00685396	0.0466866	-2.57541
PPL	-0.75261	5.93304	-2.74362	0.00686446	0.0467399	-2.57673
RBAK	-0.558449	5.18263	-2.74141	0.00690841	0.0468508	-2.5822
VRK2	-0.528917	7.41149	-2.74134	0.00690988	0.0468508	-2.58239
COG6	-0.548639	5.55444	-2.74118	0.00691298	0.0468511	-2.58277
SCEL	-0.734096	4.105	-2.73932	0.00695018	0.0469211	-2.58738
SERPING1	-0.547971	9.52121	-2.73732	0.00699044	0.0470837	-2.59233
GABRP	-0.595176	5.03841	-2.7368	0.00700095	0.0471022	-2.59362
WDR11	-0.530704	6.40079	-2.73584	0.0070204	0.0471763	-2.596
ARMC1	-0.512399	5.61782	-2.73411	0.00705547	0.0472742	-2.60028
SLC38A6	-0.767397	6.66263	-2.73405	0.00705661	0.0472742	-2.60042
ZNF75A	-0.620057	4.5882	-2.73381	0.00706159	0.0472894	-2.60102
NRIP1	-0.529555	7.18387	-2.73173	0.00710409	0.0474466	-2.60617
ARV1	-0.503781	6.55831	-2.72726	0.00719605	0.0479142	-2.6172
FIG4	-0.688401	7.21427	-2.72679	0.00720582	0.0479337	-2.61836
ATL1	-0.661637	5.11602	-2.72666	0.00720838	0.0479337	-2.61867
C3orf14	-0.536827	6.03224	-2.72165	0.00731295	0.0481855	-2.63101
ZNHIT6	-0.611068	4.8974	-2.7216	0.00731404	0.0481855	-2.63114
C4orf52	-0.613314	5.24216	-2.71673	0.00741692	0.0486066	-2.64311
ERLIN2	-0.51413	5.66032	-2.71565	0.00744002	0.048681	-2.64578
SUMF1	-0.592324	6.76172	-2.71246	0.00750828	0.0487924	-2.6536
MGST1	-0.838226	6.99007	-2.71184	0.00752179	0.0487924	-2.65514
LOC401397	-0.562005	7.89698	-2.71165	0.00752584	0.0487924	-2.6556
NFU1	-0.623628	6.4491	-2.70423	0.00768734	0.049451	-2.67379
TCEAL3	-0.664002	6.52429	-2.70261	0.00772296	0.0495751	-2.67774
CRNN	-0.744016	5.87933	-2.6969	0.00784986	0.0498901	-2.6917
logFC	AveExpr	t	P.Value	adj.P.Val	B
IL18R1	2.11434	6.35929	6.00309	1.55055e-08	0.000135402	9.15198
BTBD19	1.26994	7.72129	5.53264	1.48266e-07	0.000517894	7.08109
TSC22D3	0.997181	9.00774	5.16659	7.96458e-07	0.0010173	5.54294
FGR	0.529789	10.6876	5.15509	8.38687e-07	0.0010173	5.49574
B3GNT5	0.764953	7.96691	5.07182	1.21669e-06	0.00115457	5.15598
NFKBIE	0.67299	7.50424	5.02406	1.50347e-06	0.00125039	4.96281
LOC100287521	1.10573	7.30091	4.99929	1.67705e-06	0.00126684	4.86313
FLOT1	0.851202	9.12793	4.98459	1.78911e-06	0.00126684	4.80413
LOC100129845	0.530076	5.14084	4.93321	2.24096e-06	0.00140423	4.59878
BIRC3	1.12359	8.18111	4.9249	2.32368e-06	0.00140423	4.56574
HIF1A	0.770867	10.8524	4.92078	2.36582e-06	0.00140423	4.54935
NEAT1	0.727148	11.0034	4.8973	2.62056e-06	0.00140423	4.45615
IL1R2	1.38933	9.64789	4.88784	2.73048e-06	0.00140423	4.4187
ETS2	0.907918	8.2148	4.88381	2.77863e-06	0.00140423	4.40277
CISH	0.653258	6.72337	4.88089	2.81409e-06	0.00140423	4.39122
CLC	2.22613	5.59406	4.84047	3.35193e-06	0.0015822	4.2319
TES	0.651348	7.49878	4.80574	3.89245e-06	0.00163923	4.09576
RHOH	1.32763	7.94813	4.80475	3.9089e-06	0.00163923	4.09192
BCL6	0.944852	9.56742	4.7814	4.3206e-06	0.00172011	4.00077
SOCS1	0.678952	6.19938	4.7807	4.3335e-06	0.00172011	3.99806
PHC2	0.830483	8.77288	4.72771	5.43237e-06	0.00203491	3.79243
ATG2A	1.02456	6.98596	4.72582	5.47614e-06	0.00203491	3.78513
SAMSN1	1.11401	8.85082	4.71989	5.61585e-06	0.00204335	3.76222
LOC284454	0.923476	10.1549	4.68097	6.62163e-06	0.00232075	3.61241
PLK3	0.747145	7.10889	4.64892	7.57885e-06	0.00248717	3.4897
VEGFA	1.27499	8.65185	4.64536	7.69291e-06	0.00248717	3.47613
CCL17	1.06839	5.6962	4.63381	8.07502e-06	0.00248717	3.43208
GPR171	1.26622	6.18621	4.62842	8.25972e-06	0.00248717	3.41154
EDN1	0.866313	5.60356	4.6165	8.68243e-06	0.0024898	3.3662
TNFAIP3	1.19126	9.27062	4.61387	8.77836e-06	0.0024898	3.35622
GADD45B	0.799832	9.98739	4.59015	9.69198e-06	0.0025647	3.26631
FLJ10038	0.9122	6.48125	4.56534	1.07458e-05	0.00271994	3.1726
SLAMF7	1.51057	9.25572	4.50764	1.36412e-05	0.0031806	2.95614
RIPK2	0.70513	7.80452	4.47639	1.55101e-05	0.00338606	2.83972
CCL22	1.28922	7.59045	4.46353	1.63488e-05	0.00345656	2.79198
LOC728153	0.668257	7.54582	4.45943	1.66247e-05	0.00345656	2.77682
MAFF	0.916699	8.27972	4.43661	1.82473e-05	0.00360291	2.69243
ADAM8	0.809897	7.61745	4.43094	1.86735e-05	0.00360291	2.67151
RLF	0.948212	6.74599	4.42198	1.93666e-05	0.0036764	2.6385
LPCAT1	1.06636	8.50382	4.41095	2.02539e-05	0.0036764	2.59793
GPR183	1.17236	8.72356	4.39657	2.14701e-05	0.00377724	2.54512
KLF9	0.529842	5.14047	4.39476	2.16275e-05	0.00377724	2.53851
ATP2A3	1.00909	6.4069	4.37866	2.30821e-05	0.0039035	2.47958
CST7	1.11164	7.77887	4.35636	2.52532e-05	0.00420045	2.39822
FAM100B	0.623829	7.90408	4.32316	2.88519e-05	0.00448762	2.27771
PER1	0.980422	6.72901	4.31206	3.01616e-05	0.00454375	2.23757
TNFRSF14	0.632207	8.28137	4.31192	3.0179e-05	0.00454375	2.23705
NFKBIA	0.744687	10.8209	4.30869	3.05703e-05	0.00456334	2.2254
IL1RL1	1.60604	6.28176	4.28575	3.34988e-05	0.00478793	2.1427
IL1R1	1.26026	7.87934	4.28238	3.39501e-05	0.00478793	2.13061
CCR7	1.15332	6.9212	4.28023	3.42423e-05	0.00478793	2.12286
EMB	0.844899	6.14828	4.25935	3.72007e-05	0.00497118	2.04799
BANP	0.609233	7.53559	4.25179	3.83312e-05	0.00507162	2.02095
LOC257358	1.017	4.82938	4.23993	4.01716e-05	0.0051393	1.97859
GNG2	1.14762	7.16069	4.23719	4.06083e-05	0.0051393	1.96883
FAM118A	0.528964	5.84965	4.2099	4.52184e-05	0.00548197	1.87175
CSF1	0.976358	7.53559	4.20712	4.57145e-05	0.00548197	1.8619
SLC20A1	0.757627	8.70355	4.19886	4.72206e-05	0.00550002	1.83265
CD69	1.21722	8.35542	4.19861	4.7268e-05	0.00550002	1.83174
C8orf60	0.642126	6.1602	4.19575	4.78012e-05	0.00550002	1.82162
JUND	0.551152	9.1325	4.19487	4.79654e-05	0.00550002	1.81852
KIF21B	0.908484	5.73135	4.1941	4.81116e-05	0.00550002	1.81578
GNA15	0.501693	7.93094	4.19372	4.81822e-05	0.00550002	1.81446
GPR97	1.22342	8.10766	4.18377	5.00969e-05	0.00557288	1.7793
TRAF1	1.02291	7.5689	4.17013	5.2841e-05	0.00560284	1.73119
IL2RA	0.808712	4.89088	4.16744	5.33993e-05	0.00560284	1.72171
PIM1	0.65173	8.93264	4.16491	5.39306e-05	0.00560284	1.71278
DUSP4	0.771673	6.90937	4.16394	5.41348e-05	0.00560284	1.70938
NLRP3	1.10816	6.31755	4.16166	5.46184e-05	0.00560284	1.70136
CFLAR	0.656658	8.18123	4.1446	5.83696e-05	0.00575947	1.64146
NINJ1	0.825176	9.50832	4.12848	6.21398e-05	0.00596304	1.58505
RNF19B	0.845148	9.19624	4.09867	6.97344e-05	0.00620352	1.48116
C5orf32	0.666626	9.08515	4.09712	7.01532e-05	0.00620352	1.47577
ABL2	0.593293	7.58554	4.08381	7.3845e-05	0.00629123	1.42958
C16orf7	0.561565	7.53158	4.06742	7.86466e-05	0.00631422	1.37287
ERN1	0.5489	5.94678	4.05202	8.34281e-05	0.00641882	1.31975
TREML2	0.908921	6.69768	4.05083	8.38119e-05	0.00642007	1.31562
SFMBT2	0.668992	5.52895	4.0484	8.45938e-05	0.00645166	1.30726
SATB1	1.05228	8.46392	4.04253	8.65134e-05	0.00649356	1.28708
PRR24	0.663834	6.0917	4.04187	8.67306e-05	0.00649356	1.28482
DDIT4	0.998468	8.44743	4.04019	8.72912e-05	0.00649356	1.27902
CD93	0.828607	6.94685	4.01664	9.54896e-05	0.00678224	1.19829
DDIT3	0.852182	8.16221	4.01653	9.55299e-05	0.00678224	1.19791
TUBA4A	0.747191	8.8317	4.01309	9.67896e-05	0.00680394	1.18613
TNIP1	0.753875	8.88618	4.00488	9.98551e-05	0.00688331	1.15809
PDE4D	0.674693	4.92376	4.00146	0.000101159	0.00689001	1.14643
TFPI	0.687399	4.61862	3.98534	0.000107534	0.00709633	1.0915
TOM1	0.537002	8.0162	3.98177	0.000108993	0.00713127	1.0794
HCRP1	0.608812	4.5597	3.97973	0.000109838	0.00713127	1.07246
CRLF2	1.08756	6.10783	3.95832	0.000119082	0.00750816	0.999874
ABTB1	0.504117	6.78797	3.94683	0.000124339	0.00773624	0.96108
SULF2	0.906149	6.70577	3.93628	0.000129364	0.00781778	0.925514
FRMD4B	0.551056	6.12589	3.92723	0.000133828	0.00794746	0.895063
PHACTR1	0.752769	10.4322	3.92456	0.000135173	0.00794746	0.88609
HSPA6	0.97566	8.35839	3.90856	0.000143504	0.00797843	0.832428
ADAM19	0.504215	5.84951	3.90748	0.000144083	0.00797843	0.828817
DNAJB1	0.916716	8.1826	3.90519	0.000145317	0.00797843	0.821168
NNMT	0.503941	5.76281	3.89995	0.000148185	0.00804826	0.803636
SPRY4	0.575915	6.30581	3.89937	0.000148508	0.00804826	0.801681
N4BP1	0.612875	7.4479	3.89641	0.000150153	0.00808236	0.791802
ADM	0.857909	9.61219	3.89304	0.000152048	0.00812087	0.780554
HMHA1	0.658193	8.32677	3.89163	0.00015285	0.00813878	0.775841
IL18RAP	1.33349	7.41675	3.88346	0.000157563	0.00830716	0.748613
ADORA3	0.796799	5.17598	3.88124	0.000158866	0.00830716	0.741228
LOC441124	0.70475	8.36768	3.87724	0.000161242	0.00835397	0.727916
HLX	0.594226	7.62383	3.87658	0.000161643	0.00835397	0.72569
PATL1	0.531481	7.46439	3.86382	0.000169472	0.00852488	0.683301
DEFB124	0.502639	5.85209	3.85197	0.000177063	0.00867023	0.644037
GK3P	0.714863	9.42402	3.84953	0.000178664	0.00869184	0.635974
FAM49B	0.806178	7.60623	3.83962	0.000185316	0.00880586	0.603231
CD300LB	0.552567	6.41242	3.83951	0.000185396	0.00880586	0.602844
ANTXR2	0.861607	7.26164	3.83932	0.000185523	0.00880586	0.602232
HRH4	0.694358	4.03871	3.83534	0.000188264	0.0088609	0.589095
IER3	0.789288	11.1206	3.823	0.000197008	0.00903054	0.548445
CIR1	0.632457	8.24444	3.82124	0.000198287	0.00903339	0.542653
C22orf37	0.90391	6.51054	3.81973	0.000199387	0.00903339	0.537703
DYSF	0.919566	7.96901	3.81065	0.00020614	0.00903339	0.507887
PLD6	0.544525	5.09566	3.80626	0.000209488	0.00903339	0.493467
PBX2	0.524516	6.54998	3.80537	0.000210173	0.00903339	0.490547
CCL26	0.643791	5.11023	3.80124	0.000213373	0.00903339	0.477028
LGALS12	1.09518	5.45348	3.80084	0.000213682	0.00903339	0.475733
REL	0.560486	7.64103	3.79648	0.000217122	0.00903339	0.46144
CCR3	0.839216	5.83156	3.79523	0.000218115	0.00903339	0.457361
FCGR2A	0.51425	9.94879	3.79379	0.000219269	0.00903339	0.45264
ARHGAP26	0.563329	6.99845	3.78727	0.000224548	0.00916312	0.431359
P2RY10	0.693024	5.41617	3.78359	0.000227585	0.00922222	0.41934
JOSD1	0.618091	7.60175	3.77911	0.000231333	0.00927881	0.404733
ITGAX	0.703997	8.36018	3.76636	0.000242324	0.00948919	0.363231
PRSS33	1.21253	6.11254	3.7601	0.000247895	0.00954994	0.34291
FCGR2B	0.736793	7.00977	3.74974	0.000257396	0.00970932	0.309298
PPP1R16B	0.724037	4.4678	3.74606	0.000260846	0.00976733	0.297399
C5orf41	0.71019	6.75174	3.74515	0.000261706	0.00976733	0.29446
RALGDS	0.817428	8.25345	3.74172	0.000264978	0.00983852	0.283359
ZDHHC18	0.564917	6.69152	3.73726	0.000269289	0.00983918	0.268941
NFKB1	0.6893	8.59427	3.7338	0.000272676	0.00988025	0.257775
CXCR4	0.811548	11.0066	3.73187	0.000274589	0.00988601	0.251529
NFAT5	0.533601	6.79751	3.73053	0.000275923	0.00988601	0.247202
HSPA1A	0.505024	11.0187	3.72953	0.000276921	0.00988601	0.243976
PLEKHO1	0.599261	7.04515	3.72642	0.000280048	0.00988601	0.233947
PRDM1	0.670389	7.27989	3.7244	0.000282097	0.00991312	0.227438
PPCDC	0.70307	6.7897	3.72025	0.000286347	0.010002	0.214083
TRIB1	0.61519	9.96589	3.71811	0.000288564	0.0100245	0.207199
SLC7A11	1.09982	6.16691	3.71456	0.000292269	0.0100909	0.195807
FAM101B	1.12621	7.19955	3.70465	0.000302877	0.0102491	0.163981
2022-03-08	0.561968	6.55428	3.6962	0.000312207	0.0102687	0.136904
KDM6B	0.587735	7.71768	3.69342	0.00031534	0.0102942	0.127995
LOC284751	1.21339	6.55496	3.69267	0.000316184	0.0103025	0.125609
RILPL2	0.668149	9.4134	3.68087	0.000329829	0.0104215	0.0879187
KLF2	0.725691	8.86694	3.68	0.000330858	0.0104215	0.0851399
ECE1	0.621015	6.67677	3.679	0.000332045	0.0104215	0.0819437
RUNX3	0.80069	7.27567	3.67733	0.000334034	0.0104215	0.0766191
DUSP1	0.590017	10.3273	3.6771	0.000334314	0.0104215	0.0758707
CHST15	1.01637	7.83522	3.67644	0.0003351	0.0104215	0.0737756
CD97	0.545435	7.77266	3.67612	0.000335486	0.0104215	0.0727488
ALOX15	1.02698	5.11798	3.67573	0.000335946	0.0104215	0.0715266
LOC641364	0.804242	5.34143	3.66775	0.000345658	0.0105725	0.0461119
NADK	0.609428	7.86317	3.65313	0.000364136	0.0107036	-0.000314272
P2RY14	1.39015	6.52648	3.6392	0.000382617	0.0110453	-0.0444308
AATK	0.559044	5.7061	3.61649	0.00041464	0.0115314	-0.11602
HDC	0.532698	4.8938	3.61556	0.000416017	0.0115513	-0.118971
MBOAT7	0.699744	6.89939	3.5994	0.0004404	0.0118775	-0.169671
IRAK3	0.860957	7.42909	3.59658	0.000444793	0.0119146	-0.178503
SEC14L1	0.639669	9.46814	3.57404	0.000481414	0.0124105	-0.248886
LCP2	0.704718	10.2206	3.56693	0.000493545	0.012639	-0.271014
HCP5	0.736388	7.8156	3.56196	0.000502184	0.0126766	-0.286441
SLC38A1	0.518335	5.31046	3.56164	0.000502754	0.0126766	-0.287449
CPA3	0.954177	4.90622	3.56009	0.000505487	0.0127026	-0.292269
JARID2	0.622971	7.73817	3.55827	0.000508711	0.0127653	-0.29792
LOC100289061	0.694107	6.25187	3.55553	0.000513595	0.0128142	-0.306412
MEFV	0.553619	9.2789	3.54529	0.000532262	0.0131239	-0.338138
BHLHE40	0.552097	9.43207	3.54458	0.000533564	0.0131249	-0.340308
C5orf40	0.805121	5.03009	3.53747	0.000546938	0.0132855	-0.362301
C5orf62	0.727593	6.6091	3.52121	0.000578681	0.0136947	-0.412404
ICAM1	0.704703	8.83842	3.51965	0.000581817	0.0136994	-0.417202
ZC3H12A	0.758399	6.53731	3.518	0.000585146	0.0137004	-0.422267
BASP1	0.7461	10.3198	3.51704	0.000587096	0.0137264	-0.42522
PRF1	0.528037	6.18871	3.50963	0.000602344	0.0139707	-0.44798
LOC731424	0.707725	7.63589	3.50722	0.000607392	0.0140319	-0.455387
ARAP3	0.776631	5.91125	3.50504	0.000611984	0.014047	-0.462071
TULP2	0.890747	6.27691	3.50461	0.000612891	0.014047	-0.463385
ITPRIP	0.614845	8.51342	3.50117	0.00062021	0.0141041	-0.473919
CCRL2	0.73059	9.54156	3.49766	0.000627758	0.0142202	-0.484651
HIST2H2BE	0.828689	7.21748	3.49271	0.00063857	0.0143905	-0.4998
PTPRE	0.55337	6.62737	3.47946	0.000668349	0.0147383	-0.540224
TMEM120A	0.559235	7.05976	3.47198	0.000685732	0.0148959	-0.562988
GZMB	1.05478	6.82201	3.46923	0.000692226	0.0149625	-0.571343
KIAA2018	0.563007	6.20263	3.46835	0.00069431	0.0149846	-0.574007
IL8	0.548893	12.4525	3.45393	0.000729432	0.0152732	-0.617738
FAM117A	0.53488	5.58339	3.45099	0.000736792	0.0152732	-0.626631
RASSF5	0.51728	8.85667	3.44816	0.000743951	0.0153205	-0.635197
TPSAB1	0.661882	5.62103	3.44784	0.000744751	0.0153205	-0.636149
RYBP	0.613522	7.59756	3.44168	0.000760563	0.0155553	-0.654757
TREML2P1	0.633036	6.81556	3.43798	0.00077021	0.0156336	-0.665918
DNAH17	0.739821	6.37139	3.4254	0.000803871	0.0160201	-0.703788
CD300A	0.578703	7.79333	3.41974	0.000819488	0.016264	-0.720816
C1orf113	0.738421	6.42483	3.41518	0.00083224	0.0164238	-0.73448
CHST7	0.648812	7.12269	3.41363	0.000836634	0.0164419	-0.739139
CYFIP2	0.640417	6.36593	3.40474	0.000862197	0.0166693	-0.765764
LOC100130357	0.855612	7.58261	3.40006	0.000875946	0.0167562	-0.779756
TBC1D15	0.611361	7.68187	3.38953	0.000907629	0.0170957	-0.811174
GK	0.536898	10.144	3.38822	0.00091165	0.0171388	-0.815081
RNF24	0.672727	6.98623	3.3846	0.000922826	0.0171559	-0.825852
PELI1	0.850983	8.65916	3.38446	0.000923264	0.0171559	-0.826271
SERPINB9	0.827918	7.29321	3.38351	0.000926212	0.0171559	-0.829089
SMAP2	0.546744	9.01739	3.38348	0.000926311	0.0171559	-0.829183
CREM	0.542871	6.97902	3.36578	0.000983049	0.0177603	-0.881711
SCARF1	0.720115	7.69944	3.3597	0.0010033	0.0179786	-0.899718
LOC730227	0.6487	5.90923	3.35903	0.00100555	0.0179786	-0.901703
MST4	0.695245	6.20541	3.35015	0.00103586	0.0182228	-0.927925
CCL5	0.735879	6.7567	3.3448	0.00105455	0.0183434	-0.943707
TTPAL	0.605038	6.34506	3.34081	0.00106868	0.0184352	-0.955454
CEP68	0.545777	6.59707	3.3308	0.00110492	0.0185283	-0.984877
RAB33A	0.598666	4.99906	3.32096	0.00114167	0.0187157	-1.01374
ZNF321	0.546442	5.50958	3.31822	0.00115212	0.0187648	-1.02177
TAGAP	0.929874	9.32113	3.31083	0.00118071	0.019129	-1.04339
CPD	0.779761	8.10632	3.30606	0.00119949	0.0193615	-1.0573
CTLA4	0.602126	4.55243	3.2997	0.001225	0.0196475	-1.07584
TLR2	0.73906	10.1996	3.29505	0.00124398	0.0198231	-1.08939
THBS1	0.90742	9.03375	3.28884	0.00126971	0.0199892	-1.10743
KCNN4	0.560144	7.09935	3.28293	0.00129471	0.0202075	-1.1246
SLC25A37	0.796907	8.22998	3.27891	0.00131192	0.020336	-1.13623
IRF1	0.81972	9.3176	3.26926	0.00135421	0.0205842	-1.16416
FGD3	0.504013	7.73697	3.26469	0.00137467	0.0207149	-1.17735
EMR2	0.723643	9.39672	3.26114	0.00139079	0.0208499	-1.18762
MCTP2	0.842833	5.57861	3.25647	0.00141223	0.0209732	-1.20107
LRRC50	0.629848	6.17817	3.2506	0.00143959	0.0211012	-1.21796
CSGALNACT2	0.503291	8.3253	3.24903	0.00144701	0.021175	-1.22248
CYTIP	0.544865	9.18236	3.24594	0.00146171	0.0212286	-1.23137
IVNS1ABP	0.571141	10.1804	3.24314	0.00147514	0.0213458	-1.23941
ALS2CR10	0.51225	7.45883	3.23862	0.00149703	0.0215526	-1.25236
FFAR3	1.08005	5.20153	3.23683	0.0015058	0.0216095	-1.2575
APOA2	0.717249	6.61715	3.22713	0.00155412	0.0219424	-1.28526
TAP1	0.540085	9.11921	3.22325	0.00157384	0.0220734	-1.29634
FABP3	0.816177	7.64129	3.21878	0.00159688	0.0221947	-1.30911
STX3	0.643282	7.42536	3.21436	0.00161993	0.0223368	-1.32169
SNAPC1	0.932349	6.74951	3.21249	0.00162977	0.0223598	-1.32702
BLM	0.674894	5.60272	3.20576	0.00166569	0.0227386	-1.34616
FLJ45340	0.719983	8.28963	3.20427	0.00167374	0.0227949	-1.35039
SPHK1	0.662089	6.31321	3.20239	0.00168398	0.0228063	-1.35575
CLK4	0.533734	6.80754	3.19869	0.00170424	0.0229488	-1.36624
LBH	0.51139	5.54373	3.18797	0.00176423	0.0233958	-1.3966
CD3E	0.528803	4.26289	3.16701	0.00188724	0.0241647	-1.45572
PGS1	0.667037	7.1316	3.16642	0.00189085	0.0241866	-1.45739
MPZ	0.573937	6.41797	3.16513	0.00189867	0.0242223	-1.46101
TRANK1	0.527563	7.20839	3.15479	0.00196261	0.024589	-1.49004
KLF10	0.578782	7.39352	3.15179	0.00198154	0.0246902	-1.49845
IL3RA	0.565827	7.38584	3.15066	0.00198872	0.0247334	-1.50162
AMPD3	0.590076	6.93362	3.15042	0.00199023	0.0247334	-1.50228
ZEB1	0.631492	4.54898	3.14934	0.00199709	0.0247722	-1.50529
RGPD5	0.558638	6.86479	3.14766	0.00200783	0.0248349	-1.50999
C10orf55	0.664039	5.57478	3.14736	0.00200979	0.0248415	-1.51085
NBN	0.629206	8.72791	3.14499	0.00202506	0.0249386	-1.51748
SPINK1	1.06006	6.93179	3.13809	0.00207008	0.0252119	-1.53673
SYNE2	0.531464	5.56308	3.13632	0.00208178	0.0252664	-1.54167
PNPLA8	0.515921	7.53447	3.13519	0.00208932	0.0253065	-1.54483
FNIP1	0.605371	7.4984	3.13309	0.00210335	0.0254093	-1.55069
LOC100288009	0.562095	5.49224	3.13221	0.00210921	0.0254577	-1.55313
PLAU	0.944278	7.72863	3.12726	0.00214272	0.0256319	-1.56692
PLEK	0.572257	10.5069	3.12339	0.00216921	0.0258603	-1.57768
SLC7A5	0.736526	6.51071	3.12205	0.00217845	0.0258862	-1.5814
MMP9	0.793255	7.46809	3.11989	0.00219347	0.0259153	-1.58741
FHL3	0.521798	5.79964	3.11764	0.00220919	0.025975	-1.59365
SLC25A13	0.714453	6.91261	3.1159	0.00222142	0.0260208	-1.59848
PPP1R15A	0.70615	9.20763	3.11249	0.00224555	0.0261631	-1.60793
MARCKSL1	0.687313	7.07042	3.10564	0.00229474	0.0264108	-1.62688
RPS16P5	0.743736	6.5371	3.10496	0.00229972	0.0264414	-1.62878
LIMS3	0.803825	6.49715	3.0992	0.00234196	0.0267069	-1.64469
KCNJ15	0.857102	8.81981	3.09824	0.00234907	0.0267365	-1.64734
INPP5A	0.525213	5.45545	3.09554	0.00236912	0.026796	-1.65477
FCAR	0.61099	6.64986	3.09175	0.00239762	0.026905	-1.66522
BCL9	0.59313	3.84078	3.08859	0.0024216	0.0270293	-1.67391
SDC2	0.623837	7.20655	3.08804	0.0024258	0.0270368	-1.67543
IFITM1	0.894732	9.27303	3.07847	0.00250001	0.0274595	-1.70175
HIST1H2AC	0.974775	6.70628	3.07277	0.00254517	0.0277474	-1.71738
ZFAND2A	0.623467	7.62317	3.07218	0.00254984	0.027781	-1.71898
ATHL1	0.595766	7.68604	3.06745	0.00258799	0.0279525	-1.73195
FAM65B	0.833408	7.48228	3.06393	0.00261663	0.0281747	-1.74155
SRPK1	0.548022	6.76493	3.05761	0.00266892	0.0283533	-1.75882
C21orf71	0.560167	5.78866	3.05573	0.00268465	0.0283994	-1.76395
FNIP2	0.610758	7.33905	3.05505	0.0026904	0.0284102	-1.76581
PDK1	0.533931	6.48863	3.04544	0.00277232	0.0288206	-1.79197
C10orf128	0.656976	6.56305	3.03993	0.00282031	0.0290489	-1.80694
FLJ10489	0.504045	4.40724	3.02238	0.0029784	0.0299814	-1.85446
FKBP5	0.63178	8.2502	3.01953	0.0030048	0.0301602	-1.86215
OLIG1	0.628976	4.43465	3.00469	0.00314594	0.0308123	-1.90211
CCL4	0.586859	11.2873	2.99829	0.00320867	0.0310985	-1.9193
CD48	0.62125	8.50072	2.99184	0.00327307	0.0313745	-1.93659
TKTL1	0.624432	4.39909	2.98358	0.00335726	0.0318493	-1.95867
EHD1	0.525184	7.64496	2.97931	0.00340153	0.032086	-1.97006
XPO6	0.525675	8.93208	2.97653	0.00343068	0.0322828	-1.97748
FOSL2	0.505143	8.93859	2.97154	0.00348355	0.0325299	-1.99077
RASSF2	0.762863	7.96212	2.9711	0.00348823	0.0325299	-1.99194
IFITM3	0.534107	10.5843	2.97054	0.0034942	0.0325299	-1.99342
C15orf29	0.6497	7.13125	2.96946	0.00350578	0.032603	-1.9963
C17orf96	0.566503	5.26043	2.96399	0.00356497	0.0329081	-2.01084
ZHX2	0.637277	6.66209	2.95489	0.00366542	0.0333941	-2.03497
LOC286058	0.708184	5.80967	2.94676	0.00375727	0.0338047	-2.05646
MAP4K4	0.620245	6.53535	2.9381	0.00385762	0.0341497	-2.07933
WTAP	0.540458	7.96953	2.93601	0.00388214	0.0342432	-2.08482
STAT4	0.728888	5.47245	2.91263	0.0041668	0.0356382	-2.14617
CD1E	0.526492	5.51429	2.90415	0.00427473	0.0362066	-2.16832
SLAMF1	0.605079	5.24475	2.88948	0.0044674	0.0371651	-2.20649
AG2	0.694749	6.14946	2.87848	0.00461719	0.0378378	-2.23502
BRAF	0.6808	6.54823	2.8783	0.00461961	0.0378378	-2.23547
PSTPIP2	0.621761	7.13926	2.87102	0.00472121	0.0381659	-2.25428
MMP12	1.22949	7.2112	2.86628	0.00478853	0.0383984	-2.26652
MIDN	0.510358	7.45517	2.86574	0.00479619	0.0384272	-2.2679
PIM2	0.618163	7.02094	2.86572	0.00479652	0.0384272	-2.26796
MUC5AC	0.73864	7.14229	2.86174	0.00485377	0.038726	-2.27821
ORM1	0.909834	6.39289	2.85362	0.00497252	0.0392077	-2.2991
C5orf58	0.663764	8.64379	2.85315	0.00497953	0.0392221	-2.30031
CCDC147	0.510568	4.77164	2.84434	0.00511139	0.0399132	-2.32288
LOC400680	0.944548	6.30208	2.84196	0.00514762	0.0400321	-2.32898
NCRNA00152	0.565861	6.43831	2.83308	0.00528472	0.0405526	-2.35166
CLEC4A	0.506108	7.25575	2.82429	0.00542381	0.0410073	-2.37407
C10orf54	0.515298	8.01196	2.81944	0.00550191	0.0414185	-2.38639
CCL2	0.808087	10.2443	2.8166	0.00554826	0.0416256	-2.39362
CLEC4E	0.647187	7.26691	2.8149	0.00557595	0.041742	-2.39792
CDC42EP2	0.516501	6.86591	2.80945	0.00566619	0.0421107	-2.41175
CD1C	0.803782	6.48174	2.80897	0.00567407	0.0421512	-2.41295
TARP	0.740972	6.11273	2.80293	0.00577568	0.0425981	-2.42824
FPR1	0.652812	8.08347	2.80066	0.00581434	0.0427821	-2.43398
SOCS2	0.918372	5.06569	2.79529	0.00590649	0.0431635	-2.44752
S1PR1	0.744582	4.45993	2.79244	0.00595594	0.0433961	-2.4547
SYAP1	0.507578	7.95664	2.78988	0.00600082	0.0434693	-2.46116
LOC100302650	0.716275	8.32601	2.73948	0.00694696	0.0469211	-2.58698
G0S2	0.580273	11.471	2.73811	0.00697462	0.0470132	-2.59039
ZNF292	0.653243	5.96604	2.73797	0.00697729	0.0470132	-2.59072
C3orf42	0.611245	5.01886	2.72293	0.00728615	0.0481536	-2.62787
EGR3	0.835321	8.61244	2.71369	0.00748189	0.0487232	-2.65058
NFE4	0.743147	6.39657	2.71163	0.00752629	0.0487924	-2.65565
C16orf54	0.706973	8.23488	2.69985	0.00778406	0.049707	-2.68449
LOC284801	0.537642	9.0541	2.69809	0.0078233	0.0497747	-2.6888
